# Supplementary material for: Assessing the Effect of the Economy for the Common Good System on Business Performance
Source: MDPI journal article supplement (doi:10.3390/systems11020106), 2023-02-15
Supplement: s1 [file s1]

# Final Results 4 IV LR and CR with moderation

## Correlation

Pearson's Correlations

| Variable          |             | Z Industry | Z Age     | Z Country | Z Nr Employees | Z Revenue | Z SPLCH  | Z OFPM   | Z Empl&Soc | Z Cust   | PRelAdv |
|-------------------|-------------|------------|-----------|-----------|----------------|-----------|----------|----------|------------|----------|---------|
| 1. Z Industry     | Pearson's r | —          |           |           |                |           |          |          |            |          |         |
| 2. Z Age          | Pearson's r | -0.053     | —         |           |                |           |          |          |            |          |         |
| 3. Z Country      | Pearson's r | 0.078      | 0.039     | —         |                |           |          |          |            |          |         |
| 4. Z Nr Employees | Pearson's r | -0.043     | -0.338*** | -0.078    | —              |           |          |          |            |          |         |
| 5. Z Revenue      | Pearson's r | -0.040     | -0.347*** | -0.024    | 0.781***       | —         |          |          |            |          |         |
| 6. Z SPLCH        | Pearson's r | -0.117     | 0.156*    | -0.121    | -0.151*        | -0.065    | —        |          |            |          |         |
| 7. Z OFPM         | Pearson's r | -0.023     | 0.190**   | 0.129     | -0.098         | -0.080    | 0.415*** | —        |            |          |         |
| 8. Z Empl&Soc     | Pearson's r | -0.094     | -0.112    | -0.163*   | 0.186**        | 0.164*    | 0.181**  | 0.181**  | —          |          |         |
| 9. Z Cust         | Pearson's r | -0.017     | 0.011     | -0.058    | 0.049          | 0.085     | 0.342*** | 0.387*** | 0.363***   | —        |         |
| 10. PRelAdv       | Pearson's r | -0.081     | 0.094     | -0.143*   | 0.058          | 0.042     | 0.490*** | 0.436*** | 0.621***   | 0.588*** | —       |

\* p < .05, \*\* p < .01, \*\*\* p < .001

Linear Regression

Model Summary - PRelAdv

| Model          | R     | R <sup>2</sup> | Adjusted R <sup>2</sup> | RMSE  | R <sup>2</sup> Change | F Change | df1 | df2 | p      | Durbin-Watson   |           |       |
|----------------|-------|----------------|-------------------------|-------|-----------------------|----------|-----|-----|--------|-----------------|-----------|-------|
|                |       |                |                         |       |                       |          |     |     |        | Autocorrelation | Statistic | p     |
| H <sub>0</sub> | 0.186 | 0.035          | 0.020                   | 0.547 | 0.035                 | 2.409    | 3   | 202 | 0.068  | 0.093           | 1.806     | 0.154 |
| H <sub>1</sub> | 0.798 | 0.637          | 0.625                   | 0.338 | 0.603                 | 82.296   | 4   | 198 | < .001 | 0.146           | 1.704     | 0.030 |

Note. Null model includes Z Industry, Z Age, Z Country

ANOVA

| Model          |            | Sum of Squares | df  | Mean Square | F      | p      |
|----------------|------------|----------------|-----|-------------|--------|--------|
| H <sub>0</sub> | Regression | 2.159          | 3   | 0.720       | 2.409  | 0.068  |
|                | Residual   | 60.347         | 202 | 0.299       |        |        |
|                | Total      | 62.506         | 205 |             |        |        |
| H <sub>1</sub> | Regression | 39.841         | 7   | 5.692       | 49.721 | < .001 |
|                | Residual   | 22.665         | 198 | 0.114       |        |        |
|                | Total      | 62.506         | 205 |             |        |        |

Note. Null model includes Z Industry, Z Age, Z Country

Coefficients

| Model          |             | Unstandardized | Standard Error | Standardized | t       | p      | 95% CI |        | Collinearity Statistics |       |
|----------------|-------------|----------------|----------------|--------------|---------|--------|--------|--------|-------------------------|-------|
|                |             |                |                |              |         |        | Lower  | Upper  | Tolerance               | VIF   |
| H <sub>0</sub> | (Intercept) | 3.644          | 0.038          |              | 95.699  | < .001 | 3.569  | 3.720  |                         |       |
|                | Z Industry  | −0.036         | 0.038          | −0.065       | −0.934  | 0.351  | −0.111 | 0.040  | 0.991                   | 1.009 |
|                | Z Age       | 0.053          | 0.038          | 0.096        | 1.389   | 0.166  | −0.022 | 0.129  | 0.995                   | 1.005 |
|                | Z Country   | −0.078         | 0.038          | −0.142       | −2.039  | 0.043  | −0.154 | −0.003 | 0.992                   | 1.008 |
| H <sub>1</sub> | (Intercept) | 3.644          | 0.024          |              | 154.602 | < .001 | 3.598  | 3.691  |                         |       |
|                | Z Industry  | 0.003          | 0.024          | 0.005        | 0.106   | 0.916  | −0.045 | 0.050  | 0.973                   | 1.028 |
|                | Z Age       | 0.045          | 0.025          | 0.081        | 1.821   | 0.070  | −0.004 | 0.093  | 0.927                   | 1.079 |
|                | Z Country   | −0.025         | 0.025          | −0.045       | −1.008  | 0.315  | −0.074 | 0.024  | 0.916                   | 1.092 |
|                | Z SPLCH     | 0.130          | 0.027          | 0.236        | 4.774   | < .001 | 0.077  | 0.184  | 0.748                   | 1.337 |
|                | Z OFPM      | 0.075          | 0.028          | 0.135        | 2.652   | 0.009  | 0.019  | 0.130  | 0.704                   | 1.420 |
|                | Z Empl&Soc  | 0.249          | 0.026          | 0.451        | 9.550   | < .001 | 0.198  | 0.301  | 0.820                   | 1.219 |
|                | Z Cust      | 0.159          | 0.028          | 0.287        | 5.741   | < .001 | 0.104  | 0.213  | 0.731                   | 1.369 |
|                |             |                |                |              |         |        |        |        |                         |       |

Bootstrap Coefficients

| Model          |             | Unstandardized | Bias                    | Standard Error | 95% bca* CI |       |
|----------------|-------------|----------------|-------------------------|----------------|-------------|-------|
|                |             |                |                         |                | Lower       | Upper |
| H <sub>0</sub> | (Intercept) | 3.645          | 8.737×10 <sup>−4</sup>  | 0.038          | 3.568       | 3.719 |
|                | Z Industry  | −0.035         | −8.169×10 <sup>−5</sup> | 0.036          | −0.113      | 0.028 |
|                | Z Age       | 0.055          | 6.489×10 <sup>−4</sup>  | 0.039          | −0.034      | 0.124 |
|                | Z Country   | −0.080         | −8.122×10 <sup>−4</sup> | 0.039          | −0.151      | 0.003 |
| H <sub>1</sub> | (Intercept) | 3.646          | 0.001                   | 0.024          | 3.594       | 3.688 |
|                | Z Industry  | 0.003          | −2.718×10 <sup>−4</sup> | 0.017          | −0.032      | 0.036 |
|                | Z Age       | 0.044          | −4.805×10 <sup>−4</sup> | 0.022          | 0.007       | 0.098 |
|                | Z Country   | −0.025         | −4.040×10 <sup>−4</sup> | 0.023          | −0.074      | 0.017 |
|                | Z SPLCH     | 0.133          | 0.001                   | 0.032          | 0.058       | 0.185 |
|                | Z OFPM      | 0.075          | 4.933×10 <sup>−4</sup>  | 0.036          | 0.009       | 0.151 |
|                | Z Empl&Soc  | 0.249          | −5.122×10 <sup>−4</sup> | 0.026          | 0.196       | 0.301 |
|                | Z Cust      | 0.159          | 1.082×10 <sup>−4</sup>  | 0.031          | 0.089       | 0.214 |

\* Bias corrected accelerated

Note. Bootstrapping based on 5000 replicates.

Note. Coefficient estimate is based on the median of the bootstrap distribution.

| Model          | Dimension | Eigenvalue | Condition Index | Variance Proportions |            |       |           |         |        |            |        |
|----------------|-----------|------------|-----------------|----------------------|------------|-------|-----------|---------|--------|------------|--------|
|                |           |            |                 | (Intercept)          | Z Industry | Z Age | Z Country | Z SPLCH | Z OFPM | Z Empl&Soc | Z Cust |
| H <sub>0</sub> | 1         | 1.080      | 1.000           | 0.000                | 0.510      | 0.029 | 0.379     |         |        |            |        |
|                | 2         | 1.035      | 1.021           | 0.000                | 0.042      | 0.697 | 0.221     |         |        |            |        |
|                | 3         | 1.000      | 1.039           | 1.000                | 0.000      | 0.000 | 0.000     |         |        |            |        |
|                | 4         | 0.885      | 1.104           | 0.000                | 0.448      | 0.273 | 0.400     |         |        |            |        |
| H <sub>1</sub> | 1         | 1.994      | 1.000           | 0.000                | 0.009      | 0.010 | 0.004     | 0.099   | 0.091  | 0.063      | 0.102  |
|                | 2         | 1.265      | 1.256           | 0.000                | 0.017      | 0.226 | 0.225     | 0.006   | 0.068  | 0.140      | 0.006  |
|                | 3         | 1.077      | 1.361           | 0.000                | 0.417      | 0.182 | 0.143     | 0.022   | 0.015  | 0.024      | 0.049  |
|                | 4         | 1.000      | 1.412           | 1.000                | 0.000      | 0.000 | 0.000     | 0.000   | 0.000  | 0.000      | 0.000  |
|                | 5         | 0.901      | 1.488           | 0.000                | 0.507      | 0.105 | 0.379     | 0.023   | 0.005  | 0.020      | 0.000  |
|                | 6         | 0.706      | 1.681           | 0.000                | 0.003      | 0.450 | 0.009     | 0.314   | 0.018  | 0.374      | 0.012  |
|                | 7         | 0.556      | 1.894           | 0.000                | 0.038      | 0.001 | 0.019     | 0.148   | 0.026  | 0.365      | 0.773  |
|                | 8         | 0.500      | 1.997           | 0.000                | 0.009      | 0.027 | 0.221     | 0.387   | 0.778  | 0.014      | 0.058  |

Residuals vs. Predicted

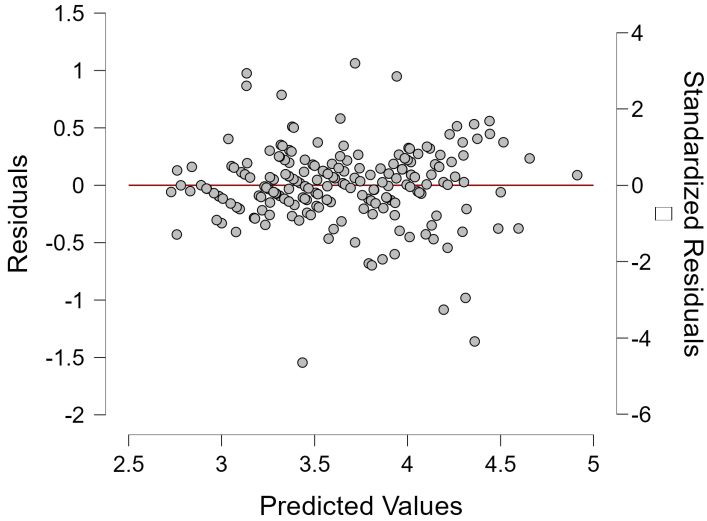

Q-Q Plot Standardized Residuals

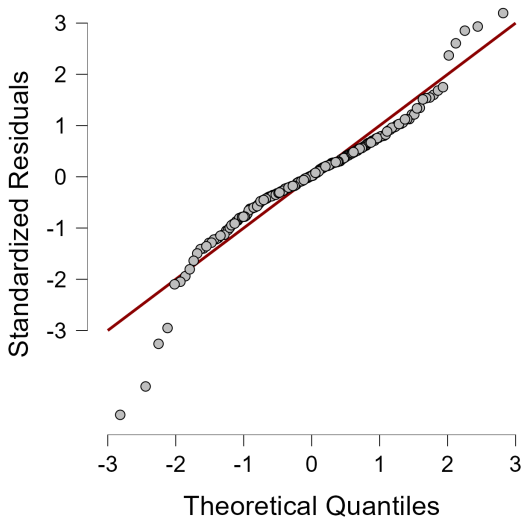

Linear Regression with Nr Empl LM

Model Summary - PRelAdv

| Model          | R     | R <sup>2</sup> | Adjusted R <sup>2</sup> | RMSE  | R <sup>2</sup> Change | F Change | df1 | df2 | p      | Durbin-Watson   |           |       |
|----------------|-------|----------------|-------------------------|-------|-----------------------|----------|-----|-----|--------|-----------------|-----------|-------|
|                |       |                |                         |       |                       |          |     |     |        | Autocorrelation | Statistic | p     |
| H <sub>0</sub> | 0.798 | 0.637          | 0.625                   | 0.338 | 0.637                 | 49.721   | 7   | 198 | < .001 | 0.146           | 1.704     | 0.030 |
| H <sub>1</sub> | 0.803 | 0.645          | 0.625                   | 0.338 | 0.008                 | 1.025    | 4   | 194 | 0.396  | 0.126           | 1.745     | 0.060 |

*Note.* Null model includes Z Industry, Z Age, Z Country, Z SPLCH, Z OFPM, Z Empl&Soc, Z Cust

ANOVA

| Model          |            | Sum of Squares | df  | Mean Square | F      | p      |
|----------------|------------|----------------|-----|-------------|--------|--------|
| H <sub>0</sub> | Regression | 39.841         | 7   | 5.692       | 49.721 | < .001 |
|                | Residual   | 22.665         | 198 | 0.114       |        |        |
|                | Total      | 62.506         | 205 |             |        |        |
| H <sub>1</sub> | Regression | 40.310         | 11  | 3.665       | 32.029 | < .001 |
|                | Residual   | 22.196         | 194 | 0.114       |        |        |
|                | Total      | 62.506         | 205 |             |        |        |

*Note.* Null model includes Z Industry, Z Age, Z Country, Z SPLCH, Z OFPM, Z Empl&Soc, Z Cust

Coefficients

| Model          |                    | Unstandardized | Standard Error | Standardized | t       | p      | 95% CI                  |       | Collinearity Statistics |       |
|----------------|--------------------|----------------|----------------|--------------|---------|--------|-------------------------|-------|-------------------------|-------|
|                |                    |                |                |              |         |        | Lower                   | Upper | Tolerance               | VIF   |
| H <sub>0</sub> | (Intercept)        | 3.644          | 0.024          |              | 154.602 | < .001 | 3.598                   | 3.691 |                         |       |
|                | Z Industry         | 0.003          | 0.024          | 0.005        | 0.106   | 0.916  | −0.045                  | 0.050 | 0.973                   | 1.028 |
|                | Z Age              | 0.045          | 0.025          | 0.081        | 1.821   | 0.070  | −0.004                  | 0.093 | 0.927                   | 1.079 |
|                | Z Country          | −0.025         | 0.025          | −0.045       | −1.008  | 0.315  | −0.074                  | 0.024 | 0.916                   | 1.092 |
|                | Z SPLCH            | 0.130          | 0.027          | 0.236        | 4.774   | < .001 | 0.077                   | 0.184 | 0.748                   | 1.337 |
|                | Z OFPM             | 0.075          | 0.028          | 0.135        | 2.652   | 0.009  | 0.019                   | 0.130 | 0.704                   | 1.420 |
|                | Z Empl&Soc         | 0.249          | 0.026          | 0.451        | 9.550   | < .001 | 0.198                   | 0.301 | 0.820                   | 1.219 |
|                | Z Cust             | 0.159          | 0.028          | 0.287        | 5.741   | < .001 | 0.104                   | 0.213 | 0.731                   | 1.369 |
| H <sub>1</sub> | (Intercept)        | 3.645          | 0.025          |              | 145.027 | < .001 | 3.596                   | 3.695 |                         |       |
|                | Z Industry         | 0.001          | 0.024          | 0.003        | 0.061   | 0.951  | −0.046                  | 0.049 | 0.972                   | 1.029 |
|                | Z Age              | 0.049          | 0.025          | 0.089        | 1.952   | 0.052  | −5.043×10 <sup>−4</sup> | 0.098 | 0.886                   | 1.129 |
|                | Z Country          | −0.031         | 0.026          | −0.055       | −1.197  | 0.233  | −0.081                  | 0.020 | 0.856                   | 1.168 |
|                | Z SPLCH            | 0.137          | 0.028          | 0.248        | 4.838   | < .001 | 0.081                   | 0.193 | 0.695                   | 1.439 |
|                | Z OFPM             | 0.073          | 0.029          | 0.132        | 2.562   | 0.011  | 0.017                   | 0.129 | 0.686                   | 1.459 |
|                | Z Empl&Soc         | 0.249          | 0.034          | 0.450        | 7.411   | < .001 | 0.182                   | 0.315 | 0.496                   | 2.017 |
|                | Z Cust             | 0.150          | 0.030          | 0.271        | 4.939   | < .001 | 0.090                   | 0.209 | 0.609                   | 1.642 |
|                | Nr Empl X SSCM     | 0.003          | 0.024          | 0.006        | 0.131   | 0.896  | −0.045                  | 0.051 | 0.839                   | 1.192 |
|                | Nr Empl X OFPM     | 0.033          | 0.028          | 0.059        | 1.200   | 0.232  | −0.021                  | 0.088 | 0.764                   | 1.309 |
|                | Nr Empl X EMPL&SOC | 0.012          | 0.045          | 0.019        | 0.259   | 0.796  | −0.077                  | 0.100 | 0.332                   | 3.012 |
|                | Nr Empl X CUST     | 0.015          | 0.031          | 0.035        | 0.495   | 0.621  | −0.045                  | 0.076 | 0.376                   | 2.661 |

Bootstrap Coefficients

| Model          |                    | Unstandardized | Bias                    | Standard Error | 95% bca* CI |       |
|----------------|--------------------|----------------|-------------------------|----------------|-------------|-------|
|                |                    |                |                         |                | Lower       | Upper |
| H <sub>0</sub> | (Intercept)        | 3.646          | 0.001                   | 0.024          | 3.595       | 3.689 |
|                | Z Industry         | 0.003          | −4.121×10 <sup>−4</sup> | 0.017          | −0.032      | 0.037 |
|                | Z Age              | 0.044          | −2.221×10 <sup>−4</sup> | 0.023          | 0.006       | 0.096 |
|                | Z Country          | −0.024         | 6.607×10 <sup>−5</sup>  | 0.024          | −0.076      | 0.018 |
|                | Z SPLCH            | 0.133          | 0.002                   | 0.032          | 0.056       | 0.184 |
|                | Z OFPM             | 0.074          | 9.213×10 <sup>−5</sup>  | 0.036          | 0.009       | 0.152 |
|                | Z Empl&Soc         | 0.248          | −7.006×10 <sup>−4</sup> | 0.026          | 0.200       | 0.300 |
|                | Z Cust             | 0.160          | 5.060×10 <sup>−4</sup>  | 0.032          | 0.090       | 0.215 |
| H <sub>1</sub> | (Intercept)        | 3.647          | 0.001                   | 0.026          | 3.588       | 3.692 |
|                | Z Industry         | 0.002          | 4.366×10 <sup>−5</sup>  | 0.017          | −0.032      | 0.033 |
|                | Z Age              | 0.048          | −6.940×10 <sup>−5</sup> | 0.023          | 0.009       | 0.100 |
|                | Z Country          | −0.030         | 3.052×10 <sup>−4</sup>  | 0.025          | −0.084      | 0.015 |
|                | Z SPLCH            | 0.138          | 8.483×10 <sup>−5</sup>  | 0.033          | 0.063       | 0.194 |
|                | Z OFPM             | 0.073          | 0.001                   | 0.035          | 0.009       | 0.148 |
|                | Z Empl&Soc         | 0.248          | −3.137×10 <sup>−4</sup> | 0.029          | 0.198       | 0.311 |
|                | Z Cust             | 0.150          | 0.002                   | 0.035          | 0.082       | 0.217 |
|                | Nr Empl X SSCM     | 0.001          | −0.003                  | 0.020          | −0.037      | 0.040 |
|                | Nr Empl X OFPM     | 0.035          | 0.004                   | 0.029          | −0.017      | 0.093 |
|                | Nr Empl X EMPL&SOC | 0.011          | 1.957×10 <sup>−4</sup>  | 0.039          | −0.058      | 0.093 |
|                | Nr Empl X CUST     | 0.015          | −7.685×10 <sup>−4</sup> | 0.033          | −0.050      | 0.078 |

\* Bias corrected accelerated

*Note.* Bootstrapping based on 5000 replicates.

*Note.* Coefficient estimate is based on the median of the bootstrap distribution.

| Model          | Dimension | Eigenvalue | Condition Index | Variance Proportions |            |       |           |         |        |            |        |                |                |
|----------------|-----------|------------|-----------------|----------------------|------------|-------|-----------|---------|--------|------------|--------|----------------|----------------|
|                |           |            |                 | (Intercept)          | Z Industry | Z Age | Z Country | Z SPLCH | Z OFPM | Z Empl&Soc | Z Cust | Nr Empl X SSCM | Nr Empl X OFPM |
| H <sub>0</sub> | 1         | 1.994      | 1.000           | 0.000                | 0.009      | 0.010 | 0.004     | 0.099   | 0.091  | 0.063      | 0.102  |                |                |
|                | 2         | 1.265      | 1.256           | 0.000                | 0.017      | 0.226 | 0.225     | 0.006   | 0.068  | 0.140      | 0.006  |                |                |
|                | 3         | 1.077      | 1.361           | 0.000                | 0.417      | 0.182 | 0.143     | 0.022   | 0.015  | 0.024      | 0.049  |                |                |
|                | 4         | 1.000      | 1.412           | 1.000                | 0.000      | 0.000 | 0.000     | 0.000   | 0.000  | 0.000      | 0.000  |                |                |
|                | 5         | 0.901      | 1.488           | 0.000                | 0.507      | 0.105 | 0.379     | 0.023   | 0.005  | 0.020      | 0.000  |                |                |
|                | 6         | 0.706      | 1.681           | 0.000                | 0.003      | 0.450 | 0.009     | 0.314   | 0.018  | 0.374      | 0.012  |                |                |
|                | 7         | 0.556      | 1.894           | 0.000                | 0.038      | 0.001 | 0.019     | 0.148   | 0.026  | 0.365      | 0.773  |                |                |
|                | 8         | 0.500      | 1.997           | 0.000                | 0.009      | 0.027 | 0.221     | 0.387   | 0.778  | 0.014      | 0.058  |                |                |
| H <sub>1</sub> | 1         | 2.070      | 1.000           | 0.003                | 0.000      | 0.000 | 0.000     | 0.020   | 0.048  | 0.018      | 0.077  | 0.006          | 0.023          |
|                | 2         | 1.953      | 1.030           | 0.003                | 0.015      | 0.020 | 0.011     | 0.078   | 0.035  | 0.023      | 0.017  | 0.000          | 0.026          |
|                | 3         | 1.376      | 1.226           | 0.071                | 0.000      | 0.092 | 0.042     | 0.011   | 0.029  | 0.015      | 0.006  | 0.211          | 0.103          |
|                | 4         | 1.280      | 1.272           | 0.105                | 0.010      | 0.113 | 0.077     | 0.005   | 0.037  | 0.091      | 0.000  | 0.043          | 0.068          |
|                | 5         | 1.078      | 1.385           | 0.073                | 0.226      | 0.046 | 0.284     | 0.010   | 0.012  | 0.011      | 0.006  | 0.067          | 0.003          |
|                | 6         | 0.940      | 1.484           | 0.000                | 0.679      | 0.000 | 0.221     | 0.010   | 0.000  | 0.004      | 0.007  | 0.038          | 0.011          |
|                | 7         | 0.863      | 1.548           | 0.612                | 0.022      | 0.020 | 0.031     | 0.003   | 0.000  | 0.053      | 0.017  | 0.072          | 0.073          |
|                | 8         | 0.776      | 1.633           | 0.002                | 0.017      | 0.578 | 0.001     | 0.157   | 0.013  | 0.111      | 0.000  | 0.004          | 0.003          |
|                | 9         | 0.603      | 1.853           | 0.000                | 0.011      | 0.086 | 0.006     | 0.199   | 0.278  | 0.014      | 0.001  | 0.281          | 0.345          |
|                | 10        | 0.487      | 2.061           | 0.010                | 0.008      | 0.001 | 0.058     | 0.061   | 0.226  | 0.014      | 0.720  | 0.142          | 0.005          |
|                | 11        | 0.416      | 2.231           | 0.008                | 0.009      | 0.000 | 0.243     | 0.440   | 0.301  | 0.043      | 0.025  | 0.118          | 0.339          |
|                | 12        | 0.159      | 3.611           | 0.112                | 0.003      | 0.043 | 0.027     | 0.004   | 0.019  | 0.602      | 0.125  | 0.017          | 0.001          |

Residuals vs. Predicted

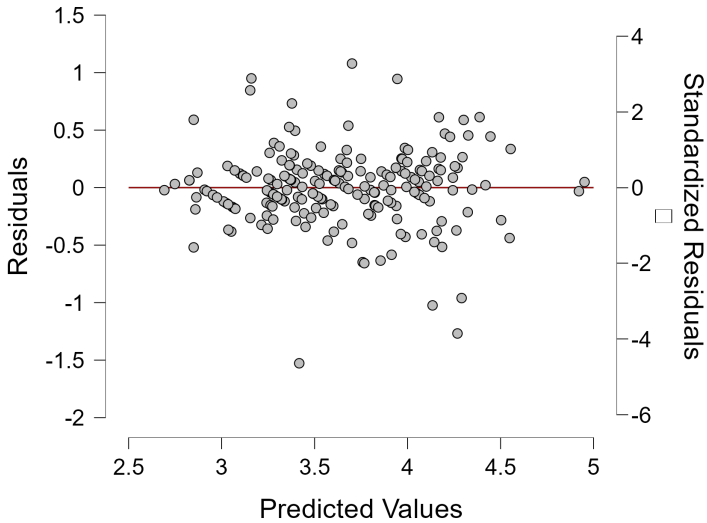

Q-Q Plot Standardized Residuals

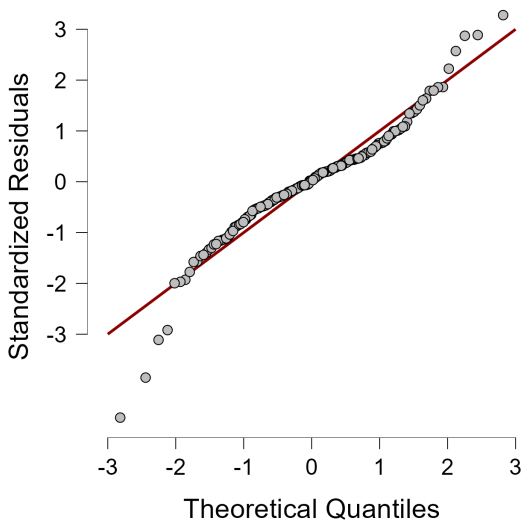

Linear Regression with 1 moderating effect

Model Summary - PRelAdv

| Model          | R     | R <sup>2</sup> | Adjusted R <sup>2</sup> | RMSE  | R <sup>2</sup> Change | F Change | df1 | df2 | p      | Durbin-Watson   |           |       |
|----------------|-------|----------------|-------------------------|-------|-----------------------|----------|-----|-----|--------|-----------------|-----------|-------|
|                |       |                |                         |       |                       |          |     |     |        | Autocorrelation | Statistic | p     |
| H <sub>0</sub> | 0.798 | 0.637          | 0.625                   | 0.338 | 0.637                 | 49.721   | 7   | 198 | < .001 | 0.146           | 1.704     | 0.030 |
| H <sub>1</sub> | 0.803 | 0.645          | 0.631                   | 0.336 | 0.008                 | 4.258    | 1   | 197 | 0.040  | 0.146           | 1.705     | 0.030 |

Note. Null model includes Z Industry, Z Age, Z Country, Z SPLCH, Z OFPM, Z Empl&Soc, Z Cust

ANOVA

| Model          |            | Sum of Squares | df  | Mean Square | F      | p      |
|----------------|------------|----------------|-----|-------------|--------|--------|
| H <sub>0</sub> | Regression | 39.841         | 7   | 5.692       | 49.721 | < .001 |
|                | Residual   | 22.665         | 198 | 0.114       |        |        |
|                | Total      | 62.506         | 205 |             |        |        |
| H <sub>1</sub> | Regression | 40.321         | 8   | 5.040       | 44.754 | < .001 |
|                | Residual   | 22.186         | 197 | 0.113       |        |        |
|                | Total      | 62.506         | 205 |             |        |        |

Note. Null model includes Z Industry, Z Age, Z Country, Z SPLCH, Z OFPM, Z Empl&Soc, Z Cust

Coefficients

| Model          |                | Unstandardized | Standard Error | Standardized | t       | p      | 95% CI |       | Collinearity Statistics |       |
|----------------|----------------|----------------|----------------|--------------|---------|--------|--------|-------|-------------------------|-------|
|                |                |                |                |              |         |        | Lower  | Upper | Tolerance               | VIF   |
| H <sub>0</sub> | (Intercept)    | 3.644          | 0.024          |              | 154.602 | < .001 | 3.598  | 3.691 |                         |       |
|                | Z Industry     | 0.003          | 0.024          | 0.005        | 0.106   | 0.916  | −0.045 | 0.050 | 0.973                   | 1.028 |
|                | Z Age          | 0.045          | 0.025          | 0.081        | 1.821   | 0.070  | −0.004 | 0.093 | 0.927                   | 1.079 |
|                | Z Country      | −0.025         | 0.025          | −0.045       | −1.008  | 0.315  | −0.074 | 0.024 | 0.916                   | 1.092 |
|                | Z SPLCH        | 0.130          | 0.027          | 0.236        | 4.774   | < .001 | 0.077  | 0.184 | 0.748                   | 1.337 |
|                | Z OFPM         | 0.075          | 0.028          | 0.135        | 2.652   | 0.009  | 0.019  | 0.130 | 0.704                   | 1.420 |
|                | Z Empl&Soc     | 0.249          | 0.026          | 0.451        | 9.550   | < .001 | 0.198  | 0.301 | 0.820                   | 1.219 |
|                | Z Cust         | 0.159          | 0.028          | 0.287        | 5.741   | < .001 | 0.104  | 0.213 | 0.731                   | 1.369 |
| H <sub>1</sub> | (Intercept)    | 3.634          | 0.024          |              | 151.897 | < .001 | 3.587  | 3.681 |                         |       |
|                | Z Industry     | 0.003          | 0.024          | 0.005        | 0.112   | 0.911  | −0.044 | 0.050 | 0.973                   | 1.028 |
|                | Z Age          | 0.050          | 0.025          | 0.091        | 2.059   | 0.041  | 0.002  | 0.099 | 0.915                   | 1.093 |
|                | Z Country      | −0.025         | 0.024          | −0.046       | −1.026  | 0.306  | −0.073 | 0.023 | 0.916                   | 1.092 |
|                | Z SPLCH        | 0.141          | 0.028          | 0.256        | 5.117   | < .001 | 0.087  | 0.196 | 0.721                   | 1.386 |
|                | Z OFPM         | 0.070          | 0.028          | 0.127        | 2.500   | 0.013  | 0.015  | 0.125 | 0.700                   | 1.430 |
|                | Z Empl&Soc     | 0.274          | 0.029          | 0.497        | 9.596   | < .001 | 0.218  | 0.331 | 0.673                   | 1.486 |
|                | Z Cust         | 0.136          | 0.030          | 0.246        | 4.601   | < .001 | 0.078  | 0.194 | 0.629                   | 1.590 |
|                | Rev X EMPL&SOC | 0.064          | 0.031          | 0.102        | 2.063   | 0.040  | 0.003  | 0.125 | 0.744                   | 1.344 |

Bootstrap Coefficients

| Model          |                | Unstandardized | Bias                    | Standard Error | 95% bca* CI |       |
|----------------|----------------|----------------|-------------------------|----------------|-------------|-------|
|                |                |                |                         |                | Lower       | Upper |
| H <sub>0</sub> | (Intercept)    | 3.645          | 0.001                   | 0.024          | 3.597       | 3.690 |
|                | Z Industry     | 0.002          | −5.177×10 <sup>−4</sup> | 0.017          | −0.030      | 0.036 |
|                | Z Age          | 0.045          | 2.479×10 <sup>−4</sup>  | 0.023          | 0.006       | 0.096 |
|                | Z Country      | −0.024         | −1.458×10 <sup>−4</sup> | 0.023          | −0.077      | 0.016 |
|                | Z SPLCH        | 0.134          | 0.002                   | 0.032          | 0.053       | 0.183 |
|                | Z OFPM         | 0.074          | −5.647×10 <sup>−4</sup> | 0.036          | 0.007       | 0.149 |
|                | Z Empl&Soc     | 0.248          | −0.001                  | 0.026          | 0.200       | 0.299 |
|                | Z Cust         | 0.160          | 4.282×10 <sup>−4</sup>  | 0.032          | 0.090       | 0.215 |
| H <sub>1</sub> | (Intercept)    | 3.635          | 8.681×10 <sup>−4</sup>  | 0.026          | 3.579       | 3.681 |
|                | Z Industry     | 0.003          | 2.136×10 <sup>−4</sup>  | 0.017          | −0.033      | 0.035 |
|                | Z Age          | 0.049          | −3.502×10 <sup>−4</sup> | 0.023          | 0.012       | 0.106 |
|                | Z Country      | −0.023         | 0.001                   | 0.023          | −0.075      | 0.017 |
|                | Z SPLCH        | 0.143          | 0.001                   | 0.031          | 0.071       | 0.194 |
|                | Z OFPM         | 0.070          | −2.051×10 <sup>−5</sup> | 0.035          | 0.003       | 0.143 |
|                | Z Empl&Soc     | 0.275          | 0.001                   | 0.031          | 0.217       | 0.338 |
|                | Z Cust         | 0.137          | 0.001                   | 0.036          | 0.060       | 0.203 |
|                | Rev X EMPL&SOC | 0.063          | 0.003                   | 0.039          | 0.005       | 0.167 |

\* Bias corrected accelerated

Note. Bootstrapping based on 5000 replicates.

Note. Coefficient estimate is based on the median of the bootstrap distribution.

| Model          | Dimension | Eigenvalue | Condition Index | Variance Proportions |            |       |           |         |        |            |        |                |
|----------------|-----------|------------|-----------------|----------------------|------------|-------|-----------|---------|--------|------------|--------|----------------|
|                |           |            |                 | (Intercept)          | Z Industry | Z Age | Z Country | Z SPLCH | Z OFPM | Z Empl&Soc | Z Cust | Rev X EMPL&SOC |
| H <sub>0</sub> | 1         | 1.994      | 1.000           | 0.000                | 0.009      | 0.010 | 0.004     | 0.099   | 0.091  | 0.063      | 0.102  |                |
|                | 2         | 1.265      | 1.256           | 0.000                | 0.017      | 0.226 | 0.225     | 0.006   | 0.068  | 0.140      | 0.006  |                |
|                | 3         | 1.077      | 1.361           | 0.000                | 0.417      | 0.182 | 0.143     | 0.022   | 0.015  | 0.024      | 0.049  |                |
|                | 4         | 1.000      | 1.412           | 1.000                | 0.000      | 0.000 | 0.000     | 0.000   | 0.000  | 0.000      | 0.000  |                |
|                | 5         | 0.901      | 1.488           | 0.000                | 0.507      | 0.105 | 0.379     | 0.023   | 0.005  | 0.020      | 0.000  |                |
|                | 6         | 0.706      | 1.681           | 0.000                | 0.003      | 0.450 | 0.009     | 0.314   | 0.018  | 0.374      | 0.012  |                |
|                | 7         | 0.556      | 1.894           | 0.000                | 0.038      | 0.001 | 0.019     | 0.148   | 0.026  | 0.365      | 0.773  |                |
|                | 8         | 0.500      | 1.997           | 0.000                | 0.009      | 0.027 | 0.221     | 0.387   | 0.778  | 0.014      | 0.058  |                |
| H <sub>1</sub> | 1         | 1.999      | 1.000           | 0.000                | 0.009      | 0.009 | 0.005     | 0.096   | 0.087  | 0.056      | 0.083  | 0.002          |
|                | 2         | 1.416      | 1.188           | 0.053                | 0.028      | 0.020 | 0.103     | 0.000   | 0.046  | 0.076      | 0.017  | 0.203          |
|                | 3         | 1.195      | 1.293           | 0.088                | 0.011      | 0.324 | 0.065     | 0.016   | 0.018  | 0.048      | 0.053  | 0.075          |
|                | 4         | 1.053      | 1.378           | 0.246                | 0.334      | 0.073 | 0.149     | 0.011   | 0.015  | 0.019      | 0.012  | 0.016          |
|                | 5         | 0.903      | 1.488           | 0.145                | 0.592      | 0.104 | 0.146     | 0.013   | 0.001  | 0.000      | 0.006  | 0.031          |
|                | 6         | 0.895      | 1.495           | 0.401                | 0.008      | 0.005 | 0.328     | 0.010   | 0.006  | 0.089      | 0.021  | 0.099          |
|                | 7         | 0.690      | 1.703           | 0.008                | 0.002      | 0.410 | 0.000     | 0.410   | 0.024  | 0.146      | 0.094  | 0.017          |
|                | 8         | 0.503      | 1.994           | 0.000                | 0.003      | 0.022 | 0.186     | 0.262   | 0.780  | 0.002      | 0.172  | 0.002          |
|                | 9         | 0.346      | 2.402           | 0.058                | 0.012      | 0.032 | 0.018     | 0.181   | 0.023  | 0.564      | 0.543  | 0.555          |

Residuals vs. Predicted

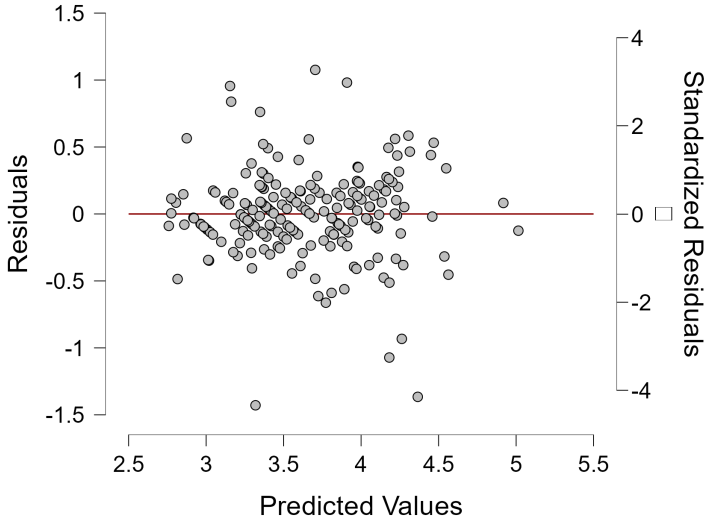

Q-Q Plot Standardized Residuals

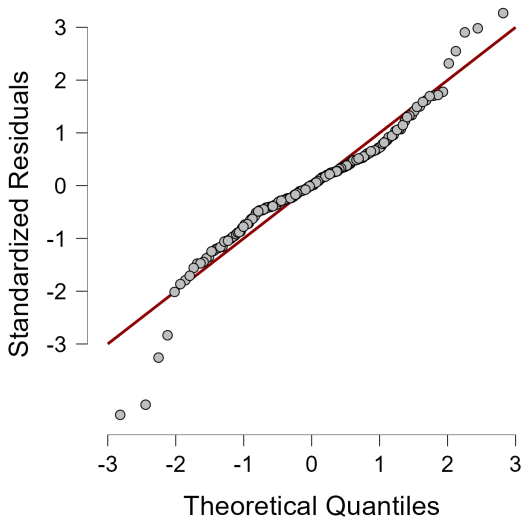

Curvilinear Regression with 1 linerar moderating effect

Model Summary - PRelAdv

| Model          | R     | R <sup>2</sup> | Adjusted R <sup>2</sup> | RMSE  | R <sup>2</sup> Change | F Change | df1 | df2 | p      | Durbin-Watson   |           |       |
|----------------|-------|----------------|-------------------------|-------|-----------------------|----------|-----|-----|--------|-----------------|-----------|-------|
|                |       |                |                         |       |                       |          |     |     |        | Autocorrelation | Statistic | p     |
| H <sub>0</sub> | 0.803 | 0.645          | 0.631                   | 0.336 | 0.645                 | 44.754   | 8   | 197 | < .001 | 0.146           | 1.705     | 0.030 |
| H <sub>1</sub> | 0.820 | 0.672          | 0.651                   | 0.326 | 0.027                 | 3.926    | 4   | 193 | 0.004  | 0.163           | 1.670     | 0.015 |

Note. Null model includes Z Industry, Z Age, Z Country, Z SPLCH, Z OFPM, Z Empl&Soc, Z Cust, Rev X EMPL&SOC

ANOVA

| Model          |            | Sum of Squares | df  | Mean Square | F      | p      |
|----------------|------------|----------------|-----|-------------|--------|--------|
| H <sub>0</sub> | Regression | 40.321         | 8   | 5.040       | 44.754 | < .001 |
|                | Residual   | 22.186         | 197 | 0.113       |        |        |
|                | Total      | 62.506         | 205 |             |        |        |
| H <sub>1</sub> | Regression | 41.990         | 12  | 3.499       | 32.917 | < .001 |
|                | Residual   | 20.516         | 193 | 0.106       |        |        |
|                | Total      | 62.506         | 205 |             |        |        |

Note. Null model includes Z Industry, Z Age, Z Country, Z SPLCH, Z OFPM, Z Empl&Soc, Z Cust, Rev X EMPL&SOC

Coefficients

| Model          |                | Unstandardized | Standard Error | Standardized | t       | p      | 95% CI |        | Collinearity Statistics |       |
|----------------|----------------|----------------|----------------|--------------|---------|--------|--------|--------|-------------------------|-------|
|                |                |                |                |              |         |        | Lower  | Upper  | Tolerance               | VIF   |
| H <sub>0</sub> | (Intercept)    | 3.634          | 0.024          |              | 151.897 | < .001 | 3.587  | 3.681  |                         |       |
|                | Z Industry     | 0.003          | 0.024          | 0.005        | 0.112   | 0.911  | -0.044 | 0.050  | 0.973                   | 1.028 |
|                | Z Age          | 0.050          | 0.025          | 0.091        | 2.059   | 0.041  | 0.002  | 0.099  | 0.915                   | 1.093 |
|                | Z Country      | -0.025         | 0.024          | -0.046       | -1.026  | 0.306  | -0.073 | 0.023  | 0.916                   | 1.092 |
|                | Z SPLCH        | 0.141          | 0.028          | 0.256        | 5.117   | < .001 | 0.087  | 0.196  | 0.721                   | 1.386 |
|                | Z OFPM         | 0.070          | 0.028          | 0.127        | 2.500   | 0.013  | 0.015  | 0.125  | 0.700                   | 1.430 |
|                | Z Empl&Soc     | 0.274          | 0.029          | 0.497        | 9.596   | < .001 | 0.218  | 0.331  | 0.673                   | 1.486 |
|                | Z Cust         | 0.136          | 0.030          | 0.246        | 4.601   | < .001 | 0.078  | 0.194  | 0.629                   | 1.590 |
|                | Rev X EMPL&SOC | 0.064          | 0.031          | 0.102        | 2.063   | 0.040  | 0.003  | 0.125  | 0.744                   | 1.344 |
| H <sub>1</sub> | (Intercept)    | 3.734          | 0.042          |              | 89.523  | < .001 | 3.652  | 3.817  |                         |       |
|                | Z Industry     | -0.002         | 0.023          | -0.004       | -0.098  | 0.922  | -0.048 | 0.043  | 0.969                   | 1.032 |
|                | Z Age          | 0.029          | 0.025          | 0.052        | 1.160   | 0.248  | -0.020 | 0.078  | 0.832                   | 1.202 |
|                | Z Country      | -0.015         | 0.024          | -0.026       | -0.599  | 0.550  | -0.063 | 0.034  | 0.870                   | 1.149 |
|                | Z SPLCH        | 0.158          | 0.028          | 0.287        | 5.714   | < .001 | 0.104  | 0.213  | 0.674                   | 1.484 |
|                | Z OFPM         | 0.114          | 0.032          | 0.206        | 3.554   | < .001 | 0.051  | 0.177  | 0.505                   | 1.980 |
|                | Z Empl&Soc     | 0.263          | 0.030          | 0.476        | 8.834   | < .001 | 0.204  | 0.321  | 0.586                   | 1.706 |
|                | Z Cust         | 0.141          | 0.030          | 0.255        | 4.698   | < .001 | 0.082  | 0.200  | 0.576                   | 1.735 |
|                | Rev X EMPL&SOC | 0.057          | 0.034          | 0.090        | 1.666   | 0.097  | -0.010 | 0.124  | 0.589                   | 1.698 |
|                | Sq SSCM        | -0.057         | 0.021          | -0.122       | -2.629  | 0.009  | -0.099 | -0.014 | 0.787                   | 1.271 |
|                | Sq OFPM        | -0.053         | 0.023          | -0.120       | -2.254  | 0.025  | -0.099 | -0.007 | 0.603                   | 1.659 |
|                | Sq EMPL&SOC    | 0.002          | 0.024          | 0.005        | 0.098   | 0.922  | -0.046 | 0.051  | 0.705                   | 1.418 |
|                | Sq CUST        | 0.007          | 0.016          | 0.025        | 0.468   | 0.641  | -0.024 | 0.039  | 0.588                   | 1.701 |



Bootstrap Coefficients

| Model          |                | Unstandardized         | Bias                    | Standard Error | 95% bca* CI |        |
|----------------|----------------|------------------------|-------------------------|----------------|-------------|--------|
|                |                |                        |                         |                | Lower       | Upper  |
| H <sub>0</sub> | (Intercept)    | 3.635                  | 0.001                   | 0.026          | 3.580       | 3.682  |
|                | Z Industry     | 0.003                  | 7.120×10 <sup>-6</sup>  | 0.017          | -0.032      | 0.034  |
|                | Z Age          | 0.050                  | -2.248×10 <sup>-4</sup> | 0.023          | 0.010       | 0.100  |
|                | Z Country      | -0.024                 | 0.001                   | 0.023          | -0.077      | 0.016  |
|                | Z SPLCH        | 0.143                  | 9.335×10 <sup>-4</sup>  | 0.031          | 0.072       | 0.194  |
|                | Z OFPM         | 0.069                  | -4.889×10 <sup>-4</sup> | 0.035          | 0.005       | 0.140  |
|                | Z Empl&Soc     | 0.274                  | 0.001                   | 0.030          | 0.219       | 0.337  |
|                | Z Cust         | 0.138                  | 0.002                   | 0.036          | 0.061       | 0.203  |
|                | Rev X EMPL&SOC | 0.064                  | 0.003                   | 0.039          | 0.003       | 0.172  |
| H <sub>1</sub> | (Intercept)    | 3.730                  | -0.003                  | 0.042          | 3.659       | 3.829  |
|                | Z Industry     | -0.001                 | 6.519×10 <sup>-4</sup>  | 0.017          | -0.037      | 0.029  |
|                | Z Age          | 0.029                  | 3.871×10 <sup>-4</sup>  | 0.022          | -0.012      | 0.072  |
|                | Z Country      | -0.013                 | 7.164×10 <sup>-4</sup>  | 0.023          | -0.064      | 0.026  |
|                | Z SPLCH        | 0.160                  | 7.243×10 <sup>-4</sup>  | 0.029          | 0.094       | 0.210  |
|                | Z OFPM         | 0.112                  | -1.715×10 <sup>-4</sup> | 0.035          | 0.054       | 0.194  |
|                | Z Empl&Soc     | 0.265                  | 0.001                   | 0.035          | 0.193       | 0.332  |
|                | Z Cust         | 0.143                  | 0.002                   | 0.033          | 0.075       | 0.202  |
|                | Rev X EMPL&SOC | 0.059                  | 0.005                   | 0.045          | -0.018      | 0.157  |
|                | Sq SSCM        | -0.055                 | 0.001                   | 0.026          | -0.119      | -0.011 |
|                | Sq OFPM        | -0.053                 | -7.508×10 <sup>-4</sup> | 0.027          | -0.107      | -0.001 |
|                | Sq EMPL&SOC    | 9.010×10 <sup>-4</sup> | -0.001                  | 0.026          | -0.047      | 0.055  |
|                | Sq CUST        | 0.010                  | 0.004                   | 0.022          | -0.036      | 0.049  |

\* Bias corrected accelerated  
*Note.* Bootstrapping based on 5000 replicates.  
*Note.* Coefficient estimate is based on the median of the bootstrap distribution.

Collinearity Diagnostics

| Model          | Dimension | Eigenvalue | Condition Index | Variance Proportions |            |       |           |         |        |            |        |                |         |         |
|----------------|-----------|------------|-----------------|----------------------|------------|-------|-----------|---------|--------|------------|--------|----------------|---------|---------|
|                |           |            |                 | (Intercept)          | Z Industry | Z Age | Z Country | Z SPLCH | Z OFPM | Z Empl&Soc | Z Cust | Rev X EMPL&SOC | Sq SSCM | Sq OFPM |
| H <sub>0</sub> | 1         | 1.999      | 1.000           | 0.000                | 0.009      | 0.009 | 0.005     | 0.096   | 0.087  | 0.056      | 0.083  | 0.002          |         |         |
|                | 2         | 1.416      | 1.188           | 0.053                | 0.028      | 0.020 | 0.103     | 0.000   | 0.046  | 0.076      | 0.017  | 0.203          |         |         |
|                | 3         | 1.195      | 1.293           | 0.088                | 0.011      | 0.324 | 0.065     | 0.016   | 0.018  | 0.048      | 0.053  | 0.075          |         |         |
|                | 4         | 1.053      | 1.378           | 0.246                | 0.334      | 0.073 | 0.149     | 0.011   | 0.015  | 0.019      | 0.012  | 0.016          |         |         |
|                | 5         | 0.903      | 1.488           | 0.145                | 0.592      | 0.104 | 0.146     | 0.013   | 0.001  | 0.000      | 0.006  | 0.031          |         |         |
|                | 6         | 0.895      | 1.495           | 0.401                | 0.008      | 0.005 | 0.328     | 0.010   | 0.006  | 0.089      | 0.021  | 0.099          |         |         |
|                | 7         | 0.690      | 1.703           | 0.008                | 0.002      | 0.410 | 0.000     | 0.410   | 0.024  | 0.146      | 0.094  | 0.017          |         |         |
|                | 8         | 0.503      | 1.994           | 0.000                | 0.003      | 0.022 | 0.186     | 0.262   | 0.780  | 0.002      | 0.172  | 0.002          |         |         |
|                | 9         | 0.346      | 2.402           | 0.058                | 0.012      | 0.032 | 0.018     | 0.181   | 0.023  | 0.564      | 0.543  | 0.555          |         |         |
| H <sub>1</sub> | 1         | 3.420      | 1.000           | 0.016                | 0.000      | 0.000 | 0.000     | 0.002   | 0.005  | 0.000      | 0.006  | 0.010          | 0.025   | 0.019   |
|                | 2         | 2.044      | 1.294           | 0.005                | 0.010      | 0.005 | 0.006     | 0.081   | 0.046  | 0.054      | 0.048  | 0.016          | 0.001   | 0.002   |
|                | 3         | 1.378      | 1.575           | 0.000                | 0.002      | 0.212 | 0.066     | 0.018   | 0.048  | 0.091      | 0.010  | 0.001          | 0.002   | 0.005   |
|                | 4         | 1.242      | 1.659           | 0.028                | 0.075      | 0.007 | 0.047     | 0.004   | 0.011  | 0.003      | 0.095  | 0.146          | 0.012   | 0.018   |
|                | 5         | 1.066      | 1.791           | 0.000                | 0.139      | 0.093 | 0.330     | 0.005   | 0.011  | 0.009      | 0.012  | 0.055          | 0.015   | 0.017   |
|                | 6         | 0.933      | 1.915           | 0.004                | 0.734      | 0.010 | 0.199     | 0.006   | 0.000  | 0.001      | 0.000  | 0.008          | 0.002   | 0.001   |
|                | 7         | 0.800      | 2.068           | 0.004                | 0.003      | 0.373 | 0.073     | 0.126   | 0.010  | 0.153      | 0.012  | 0.035          | 0.001   | 0.026   |
|                | 8         | 0.568      | 2.455           | 0.001                | 0.019      | 0.039 | 0.066     | 0.404   | 0.315  | 0.041      | 0.016  | 0.005          | 0.033   | 0.017   |
|                | 9         | 0.408      | 2.895           | 0.004                | 0.003      | 0.000 | 0.021     | 0.152   | 0.000  | 0.132      | 0.401  | 0.083          | 0.349   | 0.018   |
|                | 10        | 0.368      | 3.049           | 0.066                | 0.007      | 0.219 | 0.160     | 0.095   | 0.009  | 0.006      | 0.091  | 0.034          | 0.137   | 0.066   |
|                | 11        | 0.312      | 3.312           | 0.031                | 0.007      | 0.003 | 0.000     | 0.104   | 0.076  | 0.129      | 0.302  | 0.050          | 0.392   | 0.345   |
|                | 12        | 0.292      | 3.422           | 0.100                | 0.001      | 0.034 | 0.012     | 0.000   | 0.079  | 0.242      | 0.006  | 0.556          | 0.012   | 0.024   |
|                | 13        | 0.169      | 4.494           | 0.741                | 0.001      | 0.005 | 0.019     | 0.002   | 0.390  | 0.140      | 0.000  | 0.003          | 0.019   | 0.442   |

Residuals vs. Predicted

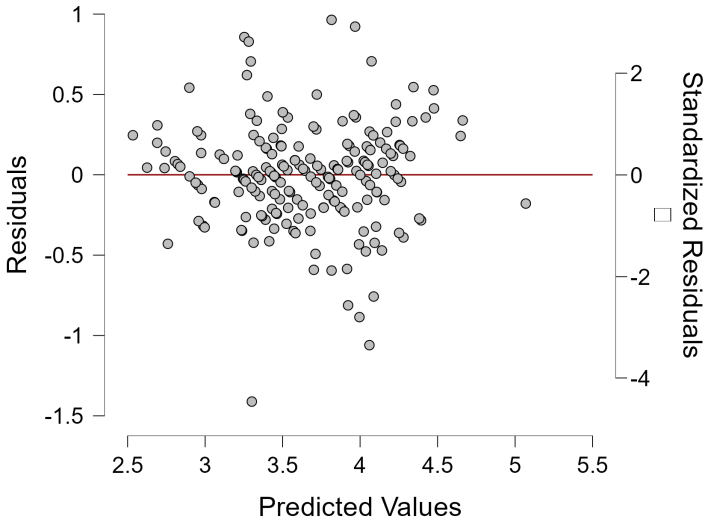

Q-Q Plot Standardized Residuals

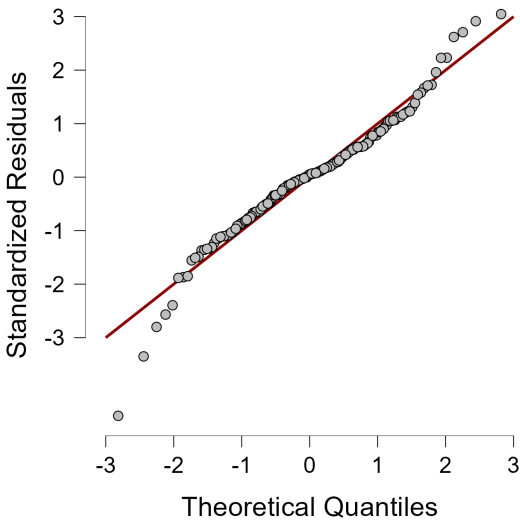

CR with 1 LM and Nr Empl CLM

Model Summary - PRelAdv

| Model          | R     | R <sup>2</sup> | Adjusted R <sup>2</sup> | RMSE  | R <sup>2</sup> Change | F Change | df1 | df2 | p      | Durbin-Watson   |           |       |
|----------------|-------|----------------|-------------------------|-------|-----------------------|----------|-----|-----|--------|-----------------|-----------|-------|
|                |       |                |                         |       |                       |          |     |     |        | Autocorrelation | Statistic | p     |
| H <sub>0</sub> | 0.819 | 0.671          | 0.654                   | 0.325 | 0.671                 | 39.833   | 10  | 195 | < .001 | 0.160           | 1.676     | 0.017 |
| H <sub>1</sub> | 0.821 | 0.674          | 0.650                   | 0.327 | 0.003                 | 0.372    | 4   | 191 | 0.829  | 0.150           | 1.695     | 0.023 |

Note. Null model includes Z Industry, Z Age, Z Country, Z SPLCH, Z OFPM, Z Empl&Soc, Z Cust, Rev X EMPL&SOC, Sq SSCM, Sq OFPM

ANOVA

| Model          |            | Sum of Squares | df  | Mean Square | F      | p      |
|----------------|------------|----------------|-----|-------------|--------|--------|
| H <sub>0</sub> | Regression | 41.963         | 10  | 4.196       | 39.833 | < .001 |
|                | Residual   | 20.543         | 195 | 0.105       |        |        |
|                | Total      | 62.506         | 205 |             |        |        |
| H <sub>1</sub> | Regression | 42.122         | 14  | 3.009       | 28.192 | < .001 |
|                | Residual   | 20.384         | 191 | 0.107       |        |        |
|                | Total      | 62.506         | 205 |             |        |        |

Note. Null model includes Z Industry, Z Age, Z Country, Z SPLCH, Z OFPM, Z Empl&Soc, Z Cust, Rev X EMPL&SOC, Sq SSCM, Sq OFPM

Coefficients

| Model          |                       | Unstandardized | Standard Error | Standardized | t       | p      | 95% CI |                         | Collinearity Statistics |       |
|----------------|-----------------------|----------------|----------------|--------------|---------|--------|--------|-------------------------|-------------------------|-------|
|                |                       |                |                |              |         |        | Lower  | Upper                   | Tolerance               | VIF   |
| H <sub>0</sub> | (Intercept)           | 3.739          | 0.035          |              | 105.415 | < .001 | 3.669  | 3.809                   |                         |       |
|                | Z Industry            | -0.002         | 0.023          | -0.004       | -0.102  | 0.919  | -0.048 | 0.043                   | 0.969                   | 1.032 |
|                | Z Age                 | 0.029          | 0.024          | 0.052        | 1.186   | 0.237  | -0.019 | 0.077                   | 0.868                   | 1.152 |
|                | Z Country             | -0.014         | 0.024          | -0.025       | -0.584  | 0.560  | -0.061 | 0.033                   | 0.899                   | 1.112 |
|                | Z SPLCH               | 0.157          | 0.027          | 0.285        | 5.775   | < .001 | 0.104  | 0.211                   | 0.693                   | 1.443 |
|                | Z OFPM                | 0.112          | 0.031          | 0.202        | 3.639   | < .001 | 0.051  | 0.172                   | 0.546                   | 1.833 |
|                | Z Empl&Soc            | 0.266          | 0.028          | 0.482        | 9.599   | < .001 | 0.212  | 0.321                   | 0.668                   | 1.497 |
|                | Z Cust                | 0.145          | 0.029          | 0.262        | 4.996   | < .001 | 0.088  | 0.202                   | 0.614                   | 1.630 |
|                | Rev X EMPL&SOC        | 0.064          | 0.030          | 0.101        | 2.121   | 0.035  | 0.004  | 0.123                   | 0.742                   | 1.347 |
|                | Sq SSCM               | -0.054         | 0.021          | -0.117       | -2.596  | 0.010  | -0.095 | -0.013                  | 0.832                   | 1.202 |
|                | Sq OFPM               | -0.052         | 0.023          | -0.117       | -2.235  | 0.027  | -0.097 | -0.006                  | 0.617                   | 1.622 |
| H <sub>1</sub> | (Intercept)           | 3.725          | 0.038          |              | 97.436  | < .001 | 3.649  | 3.800                   |                         |       |
|                | Z Industry            | -0.001         | 0.023          | -0.003       | -0.060  | 0.953  | -0.047 | 0.044                   | 0.966                   | 1.035 |
|                | Z Age                 | 0.033          | 0.025          | 0.059        | 1.316   | 0.190  | -0.016 | 0.081                   | 0.849                   | 1.178 |
|                | Z Country             | -0.014         | 0.024          | -0.026       | -0.578  | 0.564  | -0.062 | 0.034                   | 0.877                   | 1.141 |
|                | Z SPLCH               | 0.165          | 0.029          | 0.299        | 5.637   | < .001 | 0.107  | 0.223                   | 0.608                   | 1.645 |
|                | Z OFPM                | 0.107          | 0.032          | 0.193        | 3.373   | < .001 | 0.044  | 0.169                   | 0.521                   | 1.919 |
|                | Z Empl&Soc            | 0.269          | 0.030          | 0.487        | 8.902   | < .001 | 0.210  | 0.329                   | 0.570                   | 1.756 |
|                | Z Cust                | 0.145          | 0.029          | 0.262        | 4.933   | < .001 | 0.087  | 0.203                   | 0.605                   | 1.652 |
|                | Rev X EMPL&SOC        | 0.059          | 0.037          | 0.094        | 1.618   | 0.107  | -0.013 | 0.132                   | 0.505                   | 1.982 |
|                | Sq SSCM               | -0.050         | 0.021          | -0.109       | -2.377  | 0.018  | -0.092 | -0.009                  | 0.809                   | 1.236 |
|                | Sq OFPM               | -0.047         | 0.024          | -0.106       | -1.991  | 0.048  | -0.094 | -4.464×10 <sup>-4</sup> | 0.597                   | 1.674 |
|                | Nr Empl X Sq SSCM     | 0.012          | 0.024          | 0.023        | 0.499   | 0.618  | -0.036 | 0.060                   | 0.779                   | 1.284 |
|                | Nr Empl X Sq OFPM     | 0.021          | 0.024          | 0.036        | 0.854   | 0.394  | -0.027 | 0.068                   | 0.935                   | 1.070 |
|                | Nr Empl X Sq EMPL&SOC | -0.023         | 0.034          | -0.045       | -0.681  | 0.497  | -0.090 | 0.044                   | 0.388                   | 2.578 |
|                | Nr Empl X Sq CUST     | 0.005          | 0.011          | 0.035        | 0.460   | 0.646  | -0.016 | 0.026                   | 0.301                   | 3.327 |

Bootstrap Coefficients

| Model          |                       | Unstandardized          | Bias                    | Standard Error | 95% bca* CI |        |
|----------------|-----------------------|-------------------------|-------------------------|----------------|-------------|--------|
|                |                       |                         |                         |                | Lower       | Upper  |
| H <sub>0</sub> | (Intercept)           | 3.738                   | −0.001                  | 0.040          | 3.664       | 3.823  |
|                | Z Industry            | −0.002                  | 9.473×10 <sup>−5</sup>  | 0.017          | −0.037      | 0.028  |
|                | Z Age                 | 0.029                   | −3.501×10 <sup>−4</sup> | 0.021          | −0.012      | 0.071  |
|                | Z Country             | −0.013                  | 5.996×10 <sup>−4</sup>  | 0.022          | −0.063      | 0.026  |
|                | Z SPLCH               | 0.159                   | 0.002                   | 0.027          | 0.096       | 0.206  |
|                | Z OFPM                | 0.109                   | −0.001                  | 0.035          | 0.051       | 0.193  |
|                | Z Empl&Soc            | 0.266                   | 3.350×10 <sup>−4</sup>  | 0.030          | 0.213       | 0.329  |
|                | Z Cust                | 0.147                   | 0.002                   | 0.035          | 0.069       | 0.205  |
|                | Rev X EMPL&SOC        | 0.063                   | 0.002                   | 0.038          | 0.004       | 0.164  |
|                | Sq SSCM               | −0.052                  | 0.001                   | 0.025          | −0.111      | −0.013 |
| H <sub>1</sub> | Sq OFPM               | −0.051                  | 6.393×10 <sup>−5</sup>  | 0.027          | −0.107      | −0.002 |
|                | (Intercept)           | 3.723                   | −0.002                  | 0.040          | 3.650       | 3.807  |
|                | Z Industry            | −2.974×10 <sup>−4</sup> | 7.041×10 <sup>−4</sup>  | 0.017          | −0.036      | 0.029  |
|                | Z Age                 | 0.032                   | −0.001                  | 0.022          | −0.010      | 0.077  |
|                | Z Country             | −0.011                  | 0.002                   | 0.022          | −0.063      | 0.026  |
|                | Z SPLCH               | 0.167                   | 0.001                   | 0.028          | 0.103       | 0.215  |
|                | Z OFPM                | 0.104                   | −0.002                  | 0.035          | 0.046       | 0.184  |
|                | Z Empl&Soc            | 0.273                   | 0.004                   | 0.034          | 0.205       | 0.337  |
|                | Z Cust                | 0.149                   | 0.004                   | 0.035          | 0.073       | 0.207  |
|                | Rev X EMPL&SOC        | 0.066                   | 0.010                   | 0.050          | −0.021      | 0.172  |
|                | Sq SSCM               | −0.048                  | 0.003                   | 0.023          | −0.103      | −0.010 |
|                | Sq OFPM               | −0.048                  | −5.891×10 <sup>−4</sup> | 0.026          | −0.100      | 0.004  |
|                | Nr Empl X Sq SSCM     | 0.013                   | 8.163×10 <sup>−4</sup>  | 0.024          | −0.032      | 0.065  |
|                | Nr Empl X Sq OFPM     | 0.018                   | −0.001                  | 0.030          | −0.031      | 0.092  |
|                | Nr Empl X Sq EMPL&SOC | −0.020                  | 0.003                   | 0.034          | −0.089      | 0.039  |
|                | Nr Empl X Sq CUST     | 0.008                   | 0.009                   | 0.026          | −0.038      | 0.062  |

\* Bias corrected accelerated  
*Note.* Bootstrapping based on 5000 replicates.  
*Note.* Coefficient estimate is based on the median of the bootstrap distribution.

Collinearity Diagnostics

| Model          | Dimension | Eigenvalue | Condition Index | Variance Proportions |            |       |           |         |        |            |        |                |         |         |
|----------------|-----------|------------|-----------------|----------------------|------------|-------|-----------|---------|--------|------------|--------|----------------|---------|---------|
|                |           |            |                 | (Intercept)          | Z Industry | Z Age | Z Country | Z SPLCH | Z OFPM | Z Empl&Soc | Z Cust | Rev X EMPL&SOC | Sq SSCM | Sq OFPM |
| H <sub>0</sub> | 1         | 2.592      | 1.000           | 0.026                | 0.001      | 0.000 | 0.001     | 0.021   | 0.027  | 0.005      | 0.021  | 0.006          | 0.041   | 0.040   |
|                | 2         | 1.866      | 1.179           | 0.030                | 0.012      | 0.011 | 0.018     | 0.067   | 0.030  | 0.064      | 0.042  | 0.034          | 0.021   | 0.004   |
|                | 3         | 1.309      | 1.407           | 0.017                | 0.026      | 0.140 | 0.146     | 0.005   | 0.057  | 0.100      | 0.003  | 0.059          | 0.011   | 0.000   |
|                | 4         | 1.147      | 1.503           | 0.012                | 0.121      | 0.211 | 0.000     | 0.015   | 0.000  | 0.015      | 0.129  | 0.142          | 0.000   | 0.009   |
|                | 5         | 0.995      | 1.614           | 0.000                | 0.269      | 0.020 | 0.250     | 0.005   | 0.011  | 0.051      | 0.017  | 0.200          | 0.001   | 0.005   |
|                | 6         | 0.906      | 1.692           | 0.010                | 0.546      | 0.078 | 0.331     | 0.019   | 0.002  | 0.009      | 0.001  | 0.001          | 0.002   | 0.001   |
|                | 7         | 0.729      | 1.886           | 0.027                | 0.000      | 0.413 | 0.013     | 0.224   | 0.022  | 0.167      | 0.076  | 0.003          | 0.006   | 0.022   |
|                | 8         | 0.539      | 2.193           | 0.003                | 0.007      | 0.002 | 0.148     | 0.402   | 0.375  | 0.019      | 0.085  | 0.012          | 0.049   | 0.046   |
|                | 9         | 0.383      | 2.602           | 0.092                | 0.001      | 0.000 | 0.081     | 0.169   | 0.031  | 0.334      | 0.190  | 0.336          | 0.336   | 0.012   |
|                | 10        | 0.318      | 2.855           | 0.099                | 0.013      | 0.019 | 0.012     | 0.057   | 0.046  | 0.174      | 0.437  | 0.164          | 0.516   | 0.162   |
|                | 11        | 0.218      | 3.451           | 0.683                | 0.003      | 0.105 | 0.000     | 0.014   | 0.398  | 0.061      | 0.000  | 0.043          | 0.017   | 0.699   |
| H <sub>1</sub> | 1         | 2.685      | 1.000           | 0.015                | 0.000      | 0.000 | 0.001     | 0.012   | 0.022  | 0.006      | 0.028  | 0.011          | 0.031   | 0.028   |
|                | 2         | 2.320      | 1.076           | 0.008                | 0.002      | 0.010 | 0.002     | 0.015   | 0.002  | 0.002      | 0.005  | 0.018          | 0.007   | 0.012   |
|                | 3         | 1.961      | 1.170           | 0.027                | 0.009      | 0.009 | 0.015     | 0.054   | 0.022  | 0.046      | 0.033  | 0.021          | 0.019   | 0.004   |
|                | 4         | 1.321      | 1.425           | 0.012                | 0.022      | 0.168 | 0.150     | 0.003   | 0.052  | 0.079      | 0.000  | 0.016          | 0.008   | 0.000   |
|                | 5         | 1.113      | 1.553           | 0.001                | 0.022      | 0.004 | 0.061     | 0.037   | 0.001  | 0.067      | 0.003  | 0.083          | 0.004   | 0.000   |
|                | 6         | 0.991      | 1.646           | 0.002                | 0.650      | 0.102 | 0.020     | 0.006   | 0.009  | 0.002      | 0.009  | 0.003          | 0.001   | 0.001   |
|                | 7         | 0.930      | 1.699           | 0.000                | 0.167      | 0.004 | 0.258     | 0.001   | 0.020  | 0.013      | 0.001  | 0.018          | 0.000   | 0.001   |
|                | 8         | 0.862      | 1.765           | 0.022                | 0.054      | 0.228 | 0.191     | 0.009   | 0.004  | 0.010      | 0.021  | 0.000          | 0.006   | 0.001   |
|                | 9         | 0.722      | 1.928           | 0.023                | 0.051      | 0.336 | 0.038     | 0.001   | 0.061  | 0.050      | 0.053  | 0.037          | 0.002   | 0.000   |
|                | 10        | 0.592      | 2.130           | 0.001                | 0.002      | 0.019 | 0.123     | 0.018   | 0.116  | 0.009      | 0.441  | 0.010          | 0.053   | 0.083   |
|                | 11        | 0.480      | 2.365           | 0.008                | 0.004      | 0.004 | 0.016     | 0.639   | 0.200  | 0.062      | 0.001  | 0.015          | 0.007   | 0.006   |
|                | 12        | 0.344      | 2.796           | 0.140                | 0.000      | 0.017 | 0.122     | 0.059   | 0.027  | 0.203      | 0.006  | 0.180          | 0.559   | 0.005   |
|                | 13        | 0.306      | 2.963           | 0.011                | 0.010      | 0.002 | 0.000     | 0.104   | 0.073  | 0.239      | 0.377  | 0.180          | 0.271   | 0.290   |
|                | 14        | 0.212      | 3.558           | 0.259                | 0.000      | 0.044 | 0.000     | 0.012   | 0.169  | 0.190      | 0.021  | 0.380          | 0.013   | 0.309   |
|                | 15        | 0.162      | 4.068           | 0.471                | 0.007      | 0.054 | 0.003     | 0.033   | 0.222  | 0.023      | 0.001  | 0.027          | 0.018   | 0.259   |

Linear Regression with Revenue LM

Model Summary - PRelAdv

| Model          | R     | R <sup>2</sup> | Adjusted R <sup>2</sup> | RMSE  | R <sup>2</sup> Change | F Change | df1 | df2 | p      | Durbin-Watson   |           |       |
|----------------|-------|----------------|-------------------------|-------|-----------------------|----------|-----|-----|--------|-----------------|-----------|-------|
|                |       |                |                         |       |                       |          |     |     |        | Autocorrelation | Statistic | p     |
| H <sub>0</sub> | 0.798 | 0.637          | 0.625                   | 0.338 | 0.637                 | 49.721   | 7   | 198 | < .001 | 0.146           | 1.704     | 0.030 |
| H <sub>1</sub> | 0.808 | 0.654          | 0.634                   | 0.334 | 0.016                 | 2.278    | 4   | 194 | 0.062  | 0.139           | 1.720     | 0.039 |

Note. Null model includes Z Industry, Z Age, Z Country, Z SPLCH, Z OFPM, Z Empl&Soc, Z Cust

ANOVA

| Model          |            | Sum of Squares | df  | Mean Square | F      | p      |
|----------------|------------|----------------|-----|-------------|--------|--------|
| H <sub>0</sub> | Regression | 39.841         | 7   | 5.692       | 49.721 | < .001 |
|                | Residual   | 22.665         | 198 | 0.114       |        |        |
|                | Total      | 62.506         | 205 |             |        |        |
| H <sub>1</sub> | Regression | 40.858         | 11  | 3.714       | 33.286 | < .001 |
|                | Residual   | 21.648         | 194 | 0.112       |        |        |
|                | Total      | 62.506         | 205 |             |        |        |

Note. Null model includes Z Industry, Z Age, Z Country, Z SPLCH, Z OFPM, Z Empl&Soc, Z Cust

Coefficients

| Model          |                | Unstandardized | Standard Error | Standardized | t       | p      | 95% CI |       | Collinearity Statistics |       |
|----------------|----------------|----------------|----------------|--------------|---------|--------|--------|-------|-------------------------|-------|
|                |                |                |                |              |         |        | Lower  | Upper | Tolerance               | VIF   |
| H <sub>0</sub> | (Intercept)    | 3.644          | 0.024          |              | 154.602 | < .001 | 3.598  | 3.691 |                         |       |
|                | Z Industry     | 0.003          | 0.024          | 0.005        | 0.106   | 0.916  | −0.045 | 0.050 | 0.973                   | 1.028 |
|                | Z Age          | 0.045          | 0.025          | 0.081        | 1.821   | 0.070  | −0.004 | 0.093 | 0.927                   | 1.079 |
|                | Z Country      | −0.025         | 0.025          | −0.045       | −1.008  | 0.315  | −0.074 | 0.024 | 0.916                   | 1.092 |
|                | Z SPLCH        | 0.130          | 0.027          | 0.236        | 4.774   | < .001 | 0.077  | 0.184 | 0.748                   | 1.337 |
|                | Z OFPM         | 0.075          | 0.028          | 0.135        | 2.652   | 0.009  | 0.019  | 0.130 | 0.704                   | 1.420 |
|                | Z Empl&Soc     | 0.249          | 0.026          | 0.451        | 9.550   | < .001 | 0.198  | 0.301 | 0.820                   | 1.219 |
|                | Z Cust         | 0.159          | 0.028          | 0.287        | 5.741   | < .001 | 0.104  | 0.213 | 0.731                   | 1.369 |
| H <sub>1</sub> | (Intercept)    | 3.629          | 0.024          |              | 149.684 | < .001 | 3.582  | 3.677 |                         |       |
|                | Z Industry     | 0.001          | 0.024          | 0.003        | 0.062   | 0.950  | −0.045 | 0.048 | 0.971                   | 1.030 |
|                | Z Age          | 0.052          | 0.025          | 0.095        | 2.131   | 0.034  | 0.004  | 0.101 | 0.901                   | 1.110 |
|                | Z Country      | −0.026         | 0.025          | −0.046       | −1.027  | 0.306  | −0.075 | 0.023 | 0.881                   | 1.135 |
|                | Z SPLCH        | 0.138          | 0.028          | 0.249        | 4.946   | < .001 | 0.083  | 0.193 | 0.703                   | 1.423 |
|                | Z OFPM         | 0.072          | 0.028          | 0.131        | 2.588   | 0.010  | 0.017  | 0.127 | 0.698                   | 1.433 |
|                | Z Empl&Soc     | 0.298          | 0.033          | 0.539        | 9.062   | < .001 | 0.233  | 0.363 | 0.504                   | 1.984 |
|                | Z Cust         | 0.127          | 0.030          | 0.229        | 4.242   | < .001 | 0.068  | 0.186 | 0.611                   | 1.637 |
|                | Rev X SSCM     | −0.031         | 0.024          | −0.065       | −1.301  | 0.195  | −0.079 | 0.016 | 0.721                   | 1.386 |
|                | Rev X OFPM     | 0.023          | 0.028          | 0.044        | 0.823   | 0.411  | −0.032 | 0.078 | 0.617                   | 1.622 |
|                | Rev X EMPL&SOC | 0.118          | 0.047          | 0.187        | 2.535   | 0.012  | 0.026  | 0.210 | 0.327                   | 3.056 |
|                | Rev X CUST     | −0.054         | 0.029          | −0.128       | −1.870  | 0.063  | −0.111 | 0.003 | 0.378                   | 2.643 |

Bootstrap Coefficients

| Model          |                | Unstandardized | Bias                    | Standard Error | 95% bca* CI |       |
|----------------|----------------|----------------|-------------------------|----------------|-------------|-------|
|                |                |                |                         |                | Lower       | Upper |
| H <sub>0</sub> | (Intercept)    | 3.646          | 9.245×10 <sup>−4</sup>  | 0.023          | 3.595       | 3.688 |
|                | Z Industry     | 0.002          | −2.589×10 <sup>−4</sup> | 0.017          | −0.031      | 0.038 |
|                | Z Age          | 0.044          | −2.096×10 <sup>−4</sup> | 0.023          | 0.007       | 0.098 |
|                | Z Country      | −0.025         | −1.263×10 <sup>−4</sup> | 0.024          | −0.075      | 0.019 |
|                | Z SPLCH        | 0.133          | 0.001                   | 0.032          | 0.055       | 0.184 |
|                | Z OFPM         | 0.075          | 0.001                   | 0.037          | 0.008       | 0.154 |
|                | Z Empl&Soc     | 0.248          | −7.755×10 <sup>−4</sup> | 0.026          | 0.198       | 0.301 |
|                | Z Cust         | 0.159          | 1.965×10 <sup>−4</sup>  | 0.032          | 0.091       | 0.217 |
| H <sub>1</sub> | (Intercept)    | 3.634          | 0.004                   | 0.027          | 3.568       | 3.676 |
|                | Z Industry     | 0.003          | 7.293×10 <sup>−4</sup>  | 0.018          | −0.037      | 0.034 |
|                | Z Age          | 0.050          | −0.002                  | 0.022          | 0.013       | 0.100 |
|                | Z Country      | −0.023         | 0.002                   | 0.024          | −0.078      | 0.015 |
|                | Z SPLCH        | 0.142          | 0.004                   | 0.031          | 0.063       | 0.188 |
|                | Z OFPM         | 0.072          | 2.868×10 <sup>−4</sup>  | 0.035          | 0.008       | 0.145 |
|                | Z Empl&Soc     | 0.291          | −0.004                  | 0.040          | 0.235       | 0.399 |
|                | Z Cust         | 0.130          | 0.004                   | 0.040          | 0.039       | 0.198 |
|                | Rev X SSCM     | −0.028         | 0.002                   | 0.033          | −0.112      | 0.022 |
|                | Rev X OFPM     | 0.024          | 0.002                   | 0.037          | −0.043      | 0.108 |
|                | Rev X EMPL&SOC | 0.108          | −0.007                  | 0.065          | 0.018       | 0.297 |
|                | Rev X CUST     | −0.048         | 0.005                   | 0.045          | −0.167      | 0.018 |

\* Bias corrected accelerated

Note. Bootstrapping based on 5000 replicates.

Note. Coefficient estimate is based on the median of the bootstrap distribution.

| Model          | Dimension | Eigenvalue | Condition Index | Variance Proportions |            |       |           |         |        |            |        |            |            |             |
|----------------|-----------|------------|-----------------|----------------------|------------|-------|-----------|---------|--------|------------|--------|------------|------------|-------------|
|                |           |            |                 | (Intercept)          | Z Industry | Z Age | Z Country | Z SPLCH | Z OFPM | Z Empl&Soc | Z Cust | Rev X SSCM | Rev X OFPM | Rev X EMPL& |
| H <sub>0</sub> | 1         | 1.994      | 1.000           | 0.000                | 0.009      | 0.010 | 0.004     | 0.099   | 0.091  | 0.063      | 0.102  |            |            |             |
|                | 2         | 1.265      | 1.256           | 0.000                | 0.017      | 0.226 | 0.225     | 0.006   | 0.068  | 0.140      | 0.006  |            |            |             |
|                | 3         | 1.077      | 1.361           | 0.000                | 0.417      | 0.182 | 0.143     | 0.022   | 0.015  | 0.024      | 0.049  |            |            |             |
|                | 4         | 1.000      | 1.412           | 1.000                | 0.000      | 0.000 | 0.000     | 0.000   | 0.000  | 0.000      | 0.000  |            |            |             |
|                | 5         | 0.901      | 1.488           | 0.000                | 0.507      | 0.105 | 0.379     | 0.023   | 0.005  | 0.020      | 0.000  |            |            |             |
|                | 6         | 0.706      | 1.681           | 0.000                | 0.003      | 0.450 | 0.009     | 0.314   | 0.018  | 0.374      | 0.012  |            |            |             |
|                | 7         | 0.556      | 1.894           | 0.000                | 0.038      | 0.001 | 0.019     | 0.148   | 0.026  | 0.365      | 0.773  |            |            |             |
|                | 8         | 0.500      | 1.997           | 0.000                | 0.009      | 0.027 | 0.221     | 0.387   | 0.778  | 0.014      | 0.058  |            |            |             |
| H <sub>1</sub> | 1         | 2.141      | 1.000           | 0.003                | 0.000      | 0.002 | 0.003     | 0.006   | 0.030  | 0.005      | 0.048  | 0.000      | 0.044      | 0.03        |
|                | 2         | 1.971      | 1.042           | 0.002                | 0.014      | 0.016 | 0.013     | 0.091   | 0.056  | 0.040      | 0.040  | 0.001      | 0.009      | 0.07        |
|                | 3         | 1.426      | 1.225           | 0.036                | 0.002      | 0.042 | 0.019     | 0.016   | 0.011  | 0.017      | 0.015  | 0.238      | 0.085      | 0.00        |
|                | 4         | 1.283      | 1.292           | 0.043                | 0.012      | 0.193 | 0.100     | 0.006   | 0.051  | 0.080      | 0.000  | 0.031      | 0.042      | 0.01        |
|                | 5         | 1.069      | 1.415           | 0.225                | 0.281      | 0.028 | 0.196     | 0.010   | 0.017  | 0.009      | 0.006  | 0.024      | 0.001      | 0.07        |
|                | 6         | 0.933      | 1.515           | 0.259                | 0.565      | 0.013 | 0.067     | 0.019   | 0.000  | 0.000      | 0.000  | 0.045      | 0.002      | 0.00        |
|                | 7         | 0.896      | 1.546           | 0.327                | 0.077      | 0.069 | 0.350     | 0.005   | 0.007  | 0.046      | 0.011  | 0.003      | 0.006      | 0.07        |
|                | 8         | 0.743      | 1.698           | 0.008                | 0.023      | 0.566 | 0.002     | 0.167   | 0.014  | 0.156      | 0.002  | 0.003      | 0.004      | 0.00        |
|                | 9         | 0.516      | 2.036           | 0.004                | 0.000      | 0.047 | 0.110     | 0.105   | 0.709  | 0.003      | 0.262  | 0.011      | 0.048      | 0.00        |
|                | 10        | 0.481      | 2.110           | 0.002                | 0.017      | 0.010 | 0.003     | 0.498   | 0.030  | 0.022      | 0.478  | 0.162      | 0.034      | 0.00        |
|                | 11        | 0.377      | 2.382           | 0.025                | 0.007      | 0.010 | 0.120     | 0.076   | 0.074  | 0.029      | 0.000  | 0.482      | 0.721      | 0.00        |
|                | 12        | 0.164      | 3.609           | 0.065                | 0.001      | 0.003 | 0.019     | 0.000   | 0.002  | 0.592      | 0.136  | 0.001      | 0.003      | 0.88        |

Model Summary - PRelAdv

| Model          | R     | R <sup>2</sup> | Adjusted R <sup>2</sup> | RMSE  | R <sup>2</sup> Change | F Change | df1 | df2 | p      | Durbin-Watson   |           |       |
|----------------|-------|----------------|-------------------------|-------|-----------------------|----------|-----|-----|--------|-----------------|-----------|-------|
|                |       |                |                         |       |                       |          |     |     |        | Autocorrelation | Statistic | p     |
| H <sub>0</sub> | 0.803 | 0.645          | 0.631                   | 0.336 | 0.645                 | 44.754   | 8   | 197 | < .001 | 0.146           | 1.705     | 0.030 |
| H <sub>1</sub> | 0.819 | 0.671          | 0.654                   | 0.325 | 0.026                 | 7.796    | 2   | 195 | < .001 | 0.160           | 1.676     | 0.017 |

*Note.* Null model includes Z Industry, Z Age, Z Country, Z SPLCH, Z OFPM, Z Empl&Soc, Z Cust, Rev X EMPL&SOC

ANOVA

| Model          |            | Sum of Squares | df  | Mean Square | F      | p      |
|----------------|------------|----------------|-----|-------------|--------|--------|
| H <sub>0</sub> | Regression | 40.321         | 8   | 5.040       | 44.754 | < .001 |
|                | Residual   | 22.186         | 197 | 0.113       |        |        |
|                | Total      | 62.506         | 205 |             |        |        |
| H <sub>1</sub> | Regression | 41.963         | 10  | 4.196       | 39.833 | < .001 |
|                | Residual   | 20.543         | 195 | 0.105       |        |        |
|                | Total      | 62.506         | 205 |             |        |        |

*Note.* Null model includes Z Industry, Z Age, Z Country, Z SPLCH, Z OFPM, Z Empl&Soc, Z Cust, Rev X EMPL&SOC

Coefficients

| Model          |                | Unstandardized | Standard Error | Standardized | t       | p      | 95% CI |        | Collinearity Statistics |       |
|----------------|----------------|----------------|----------------|--------------|---------|--------|--------|--------|-------------------------|-------|
|                |                |                |                |              |         |        | Lower  | Upper  | Tolerance               | VIF   |
| H <sub>0</sub> | (Intercept)    | 3.634          | 0.024          |              | 151.897 | < .001 | 3.587  | 3.681  |                         |       |
|                | Z Industry     | 0.003          | 0.024          | 0.005        | 0.112   | 0.911  | −0.044 | 0.050  | 0.973                   | 1.028 |
|                | Z Age          | 0.050          | 0.025          | 0.091        | 2.059   | 0.041  | 0.002  | 0.099  | 0.915                   | 1.093 |
|                | Z Country      | −0.025         | 0.024          | −0.046       | −1.026  | 0.306  | −0.073 | 0.023  | 0.916                   | 1.092 |
|                | Z SPLCH        | 0.141          | 0.028          | 0.256        | 5.117   | < .001 | 0.087  | 0.196  | 0.721                   | 1.386 |
|                | Z OFPM         | 0.070          | 0.028          | 0.127        | 2.500   | 0.013  | 0.015  | 0.125  | 0.700                   | 1.430 |
|                | Z Empl&Soc     | 0.274          | 0.029          | 0.497        | 9.596   | < .001 | 0.218  | 0.331  | 0.673                   | 1.486 |
|                | Z Cust         | 0.136          | 0.030          | 0.246        | 4.601   | < .001 | 0.078  | 0.194  | 0.629                   | 1.590 |
|                | Rev X EMPL&SOC | 0.064          | 0.031          | 0.102        | 2.063   | 0.040  | 0.003  | 0.125  | 0.744                   | 1.344 |
|                |                |                |                |              |         |        |        |        |                         |       |
| H <sub>1</sub> | (Intercept)    | 3.739          | 0.035          |              | 105.415 | < .001 | 3.669  | 3.809  |                         |       |
|                | Z Industry     | −0.002         | 0.023          | −0.004       | −0.102  | 0.919  | −0.048 | 0.043  | 0.969                   | 1.032 |
|                | Z Age          | 0.029          | 0.024          | 0.052        | 1.186   | 0.237  | −0.019 | 0.077  | 0.868                   | 1.152 |
|                | Z Country      | −0.014         | 0.024          | −0.025       | −0.584  | 0.560  | −0.061 | 0.033  | 0.899                   | 1.112 |
|                | Z SPLCH        | 0.157          | 0.027          | 0.285        | 5.775   | < .001 | 0.104  | 0.211  | 0.693                   | 1.443 |
|                | Z OFPM         | 0.112          | 0.031          | 0.202        | 3.639   | < .001 | 0.051  | 0.172  | 0.546                   | 1.833 |
|                | Z Empl&Soc     | 0.266          | 0.028          | 0.482        | 9.599   | < .001 | 0.212  | 0.321  | 0.668                   | 1.497 |
|                | Z Cust         | 0.145          | 0.029          | 0.262        | 4.996   | < .001 | 0.088  | 0.202  | 0.614                   | 1.630 |
|                | Rev X EMPL&SOC | 0.064          | 0.030          | 0.101        | 2.121   | 0.035  | 0.004  | 0.123  | 0.742                   | 1.347 |
|                | Sq SSCM        | −0.054         | 0.021          | −0.117       | −2.596  | 0.010  | −0.095 | −0.013 | 0.832                   | 1.202 |
|                | Sq OFPM        | −0.052         | 0.023          | −0.117       | −2.235  | 0.027  | −0.097 | −0.006 | 0.617                   | 1.622 |
|                |                |                |                |              |         |        |        |        |                         |       |

Bootstrap Coefficients

| Model          |                | Unstandardized | Bias                    | Standard Error | 95% bca* CI |        |
|----------------|----------------|----------------|-------------------------|----------------|-------------|--------|
|                |                |                |                         |                | Lower       | Upper  |
| H <sub>0</sub> | (Intercept)    | 3.636          | 0.002                   | 0.026          | 3.579       | 3.681  |
|                | Z Industry     | 0.003          | 1.603×10 <sup>−5</sup>  | 0.017          | −0.032      | 0.036  |
|                | Z Age          | 0.050          | −5.782×10 <sup>−4</sup> | 0.023          | 0.009       | 0.100  |
|                | Z Country      | −0.023         | 0.001                   | 0.024          | −0.077      | 0.016  |
|                | Z SPLCH        | 0.144          | 0.001                   | 0.031          | 0.068       | 0.193  |
|                | Z OFPM         | 0.070          | 4.449×10 <sup>−5</sup>  | 0.035          | 0.004       | 0.141  |
|                | Z Empl&Soc     | 0.274          | 8.971×10 <sup>−4</sup>  | 0.030          | 0.222       | 0.342  |
|                | Z Cust         | 0.137          | 0.002                   | 0.037          | 0.060       | 0.203  |
|                | Rev X EMPL&SOC | 0.064          | 0.003                   | 0.039          | 0.005       | 0.166  |
|                |                |                |                         |                |             |        |
| H <sub>1</sub> | (Intercept)    | 3.738          | −0.001                  | 0.040          | 3.663       | 3.820  |
|                | Z Industry     | −0.002         | −5.032×10 <sup>−5</sup> | 0.017          | −0.039      | 0.028  |
|                | Z Age          | 0.030          | 4.382×10 <sup>−4</sup>  | 0.021          | −0.012      | 0.069  |
|                | Z Country      | −0.013         | 3.069×10 <sup>−4</sup>  | 0.023          | −0.062      | 0.026  |
|                | Z SPLCH        | 0.159          | 8.148×10 <sup>−4</sup>  | 0.028          | 0.095       | 0.206  |
|                | Z OFPM         | 0.110          | −9.320×10 <sup>−4</sup> | 0.035          | 0.050       | 0.190  |
|                | Z Empl&Soc     | 0.268          | 0.002                   | 0.030          | 0.208       | 0.328  |
|                | Z Cust         | 0.146          | 0.002                   | 0.033          | 0.075       | 0.206  |
|                | Rev X EMPL&SOC | 0.064          | 0.003                   | 0.039          | 0.004       | 0.162  |
|                | Sq SSCM        | −0.052         | 0.001                   | 0.025          | −0.110      | −0.012 |
|                | Sq OFPM        | −0.052         | −2.013×10 <sup>−4</sup> | 0.026          | −0.105      | −0.002 |

\* Bias corrected accelerated  
*Note.* Bootstrapping based on 5000 replicates.  
*Note.* Coefficient estimate is based on the median of the bootstrap distribution.

| Model          | Dimension | Eigenvalue | Condition Index | Variance Proportions |            |       |           |         |        |            |        |                |       | Sq SSCM | Sq OFPM |
|----------------|-----------|------------|-----------------|----------------------|------------|-------|-----------|---------|--------|------------|--------|----------------|-------|---------|---------|
|                |           |            |                 | (Intercept)          | Z Industry | Z Age | Z Country | Z SPLCH | Z OFPM | Z Empl&Soc | Z Cust | Rev X EMPL&SOC |       |         |         |
| H <sub>0</sub> | 1         | 1.999      | 1.000           | 0.000                | 0.009      | 0.009 | 0.005     | 0.096   | 0.087  | 0.056      | 0.083  | 0.002          |       |         |         |
|                | 2         | 1.416      | 1.188           | 0.053                | 0.028      | 0.020 | 0.103     | 0.000   | 0.046  | 0.076      | 0.017  | 0.203          |       |         |         |
|                | 3         | 1.195      | 1.293           | 0.088                | 0.011      | 0.324 | 0.065     | 0.016   | 0.018  | 0.048      | 0.053  | 0.075          |       |         |         |
|                | 4         | 1.053      | 1.378           | 0.246                | 0.334      | 0.073 | 0.149     | 0.011   | 0.015  | 0.019      | 0.012  | 0.016          |       |         |         |
|                | 5         | 0.903      | 1.488           | 0.145                | 0.592      | 0.104 | 0.146     | 0.013   | 0.001  | 0.000      | 0.006  | 0.031          |       |         |         |
|                | 6         | 0.895      | 1.495           | 0.401                | 0.008      | 0.005 | 0.328     | 0.010   | 0.006  | 0.089      | 0.021  | 0.099          |       |         |         |
|                | 7         | 0.690      | 1.703           | 0.008                | 0.002      | 0.410 | 0.000     | 0.410   | 0.024  | 0.146      | 0.094  | 0.017          |       |         |         |
|                | 8         | 0.503      | 1.994           | 0.000                | 0.003      | 0.022 | 0.186     | 0.262   | 0.780  | 0.002      | 0.172  | 0.002          |       |         |         |
|                | 9         | 0.346      | 2.402           | 0.058                | 0.012      | 0.032 | 0.018     | 0.181   | 0.023  | 0.564      | 0.543  | 0.555          |       |         |         |
| H <sub>1</sub> | 1         | 2.592      | 1.000           | 0.026                | 0.001      | 0.000 | 0.001     | 0.021   | 0.027  | 0.005      | 0.021  | 0.006          | 0.041 | 0.040   |         |
|                | 2         | 1.866      | 1.179           | 0.030                | 0.012      | 0.011 | 0.018     | 0.067   | 0.030  | 0.064      | 0.042  | 0.034          | 0.021 | 0.004   |         |
|                | 3         | 1.309      | 1.407           | 0.017                | 0.026      | 0.140 | 0.146     | 0.005   | 0.057  | 0.100      | 0.003  | 0.059          | 0.011 | 0.000   |         |
|                | 4         | 1.147      | 1.503           | 0.012                | 0.121      | 0.211 | 0.000     | 0.015   | 0.000  | 0.015      | 0.129  | 0.142          | 0.000 | 0.009   |         |
|                | 5         | 0.995      | 1.614           | 0.000                | 0.269      | 0.020 | 0.250     | 0.005   | 0.011  | 0.051      | 0.017  | 0.200          | 0.001 | 0.005   |         |
|                | 6         | 0.906      | 1.692           | 0.010                | 0.546      | 0.078 | 0.331     | 0.019   | 0.002  | 0.009      | 0.001  | 0.001          | 0.002 | 0.001   |         |
|                | 7         | 0.729      | 1.886           | 0.027                | 0.000      | 0.413 | 0.013     | 0.224   | 0.022  | 0.167      | 0.076  | 0.003          | 0.006 | 0.022   |         |
|                | 8         | 0.539      | 2.193           | 0.003                | 0.007      | 0.002 | 0.148     | 0.402   | 0.375  | 0.019      | 0.085  | 0.012          | 0.049 | 0.046   |         |
|                | 9         | 0.383      | 2.602           | 0.092                | 0.001      | 0.000 | 0.081     | 0.169   | 0.031  | 0.334      | 0.190  | 0.336          | 0.336 | 0.012   |         |
|                | 10        | 0.318      | 2.855           | 0.099                | 0.013      | 0.019 | 0.012     | 0.057   | 0.046  | 0.174      | 0.437  | 0.164          | 0.516 | 0.162   |         |
|                | 11        | 0.218      | 3.451           | 0.683                | 0.003      | 0.105 | 0.000     | 0.014   | 0.398  | 0.061      | 0.000  | 0.043          | 0.017 | 0.699   |         |

CR with 1 LM and Rev CLM

Model Summary - PRelAdv

| Model          | R     | R <sup>2</sup> | Adjusted R <sup>2</sup> | RMSE  | R <sup>2</sup> Change | F Change | df1 | df2 | p      | Durbin-Watson   |           |       |
|----------------|-------|----------------|-------------------------|-------|-----------------------|----------|-----|-----|--------|-----------------|-----------|-------|
|                |       |                |                         |       |                       |          |     |     |        | Autocorrelation | Statistic | p     |
| H <sub>0</sub> | 0.819 | 0.671          | 0.654                   | 0.325 | 0.671                 | 39.833   | 10  | 195 | < .001 | 0.160           | 1.676     | 0.017 |
| H <sub>1</sub> | 0.823 | 0.677          | 0.653                   | 0.325 | 0.006                 | 0.855    | 4   | 191 | 0.492  | 0.130           | 1.735     | 0.050 |

Note. Null model includes Z Industry, Z Age, Z Country, Z SPLCH, Z OFPM, Z Empl&Soc, Z Cust, Rev X EMPL&SOC, Sq SSCM, Sq OFPM

ANOVA

| Model          |            | Sum of Squares | df  | Mean Square | F      | p      |
|----------------|------------|----------------|-----|-------------|--------|--------|
| H <sub>0</sub> | Regression | 41.963         | 10  | 4.196       | 39.833 | < .001 |
|                | Residual   | 20.543         | 195 | 0.105       |        |        |
|                | Total      | 62.506         | 205 |             |        |        |
| H <sub>1</sub> | Regression | 42.325         | 14  | 3.023       | 28.612 | < .001 |
|                | Residual   | 20.182         | 191 | 0.106       |        |        |
|                | Total      | 62.506         | 205 |             |        |        |

Note. Null model includes Z Industry, Z Age, Z Country, Z SPLCH, Z OFPM, Z Empl&Soc, Z Cust, Rev X EMPL&SOC, Sq SSCM, Sq OFPM

Coefficients

| Model          |                   | Unstandardized          | Standard Error | Standardized            | t       | p      | 95% CI |        | Collinearity Statistics |       |
|----------------|-------------------|-------------------------|----------------|-------------------------|---------|--------|--------|--------|-------------------------|-------|
|                |                   |                         |                |                         |         |        | Lower  | Upper  | Tolerance               | VIF   |
| H <sub>0</sub> | (Intercept)       | 3.739                   | 0.035          |                         | 105.415 | < .001 | 3.669  | 3.809  |                         |       |
|                | Z Industry        | -0.002                  | 0.023          | -0.004                  | -0.102  | 0.919  | -0.048 | 0.043  | 0.969                   | 1.032 |
|                | Z Age             | 0.029                   | 0.024          | 0.052                   | 1.186   | 0.237  | -0.019 | 0.077  | 0.868                   | 1.152 |
|                | Z Country         | -0.014                  | 0.024          | -0.025                  | -0.584  | 0.560  | -0.061 | 0.033  | 0.899                   | 1.112 |
|                | Z SPLCH           | 0.157                   | 0.027          | 0.285                   | 5.775   | < .001 | 0.104  | 0.211  | 0.693                   | 1.443 |
|                | Z OFPM            | 0.112                   | 0.031          | 0.202                   | 3.639   | < .001 | 0.051  | 0.172  | 0.546                   | 1.833 |
|                | Z Empl&Soc        | 0.266                   | 0.028          | 0.482                   | 9.599   | < .001 | 0.212  | 0.321  | 0.668                   | 1.497 |
|                | Z Cust            | 0.145                   | 0.029          | 0.262                   | 4.996   | < .001 | 0.088  | 0.202  | 0.614                   | 1.630 |
|                | Rev X EMPL&SOC    | 0.064                   | 0.030          | 0.101                   | 2.121   | 0.035  | 0.004  | 0.123  | 0.742                   | 1.347 |
|                | Sq SSCM           | -0.054                  | 0.021          | -0.117                  | -2.596  | 0.010  | -0.095 | -0.013 | 0.832                   | 1.202 |
| H <sub>1</sub> | Sq OFPM           | -0.052                  | 0.023          | -0.117                  | -2.235  | 0.027  | -0.097 | -0.006 | 0.617                   | 1.622 |
|                | (Intercept)       | 3.741                   | 0.037          |                         | 102.439 | < .001 | 3.669  | 3.813  |                         |       |
|                | Z Industry        | -2.392×10 <sup>-4</sup> | 0.023          | -4.332×10 <sup>-4</sup> | -0.010  | 0.992  | -0.046 | 0.045  | 0.964                   | 1.037 |
|                | Z Age             | 0.019                   | 0.025          | 0.035                   | 0.764   | 0.446  | -0.030 | 0.069  | 0.815                   | 1.228 |
|                | Z Country         | -0.007                  | 0.025          | -0.012                  | -0.274  | 0.784  | -0.055 | 0.042  | 0.858                   | 1.166 |
|                | Z SPLCH           | 0.156                   | 0.028          | 0.283                   | 5.560   | < .001 | 0.101  | 0.212  | 0.651                   | 1.535 |
|                | Z OFPM            | 0.118                   | 0.031          | 0.213                   | 3.774   | < .001 | 0.056  | 0.179  | 0.531                   | 1.883 |
|                | Z Empl&Soc        | 0.269                   | 0.030          | 0.487                   | 8.859   | < .001 | 0.209  | 0.329  | 0.559                   | 1.788 |
|                | Z Cust            | 0.147                   | 0.029          | 0.266                   | 5.041   | < .001 | 0.089  | 0.205  | 0.606                   | 1.650 |
|                | Rev X EMPL&SOC    | 0.063                   | 0.037          | 0.100                   | 1.705   | 0.090  | -0.010 | 0.136  | 0.491                   | 2.035 |
|                | Sq SSCM           | -0.053                  | 0.021          | -0.115                  | -2.513  | 0.013  | -0.095 | -0.011 | 0.812                   | 1.231 |
|                | Sq OFPM           | -0.055                  | 0.023          | -0.125                  | -2.373  | 0.019  | -0.101 | -0.009 | 0.606                   | 1.651 |
|                | Rev X Sq SSCM     | -0.030                  | 0.022          | -0.065                  | -1.371  | 0.172  | -0.074 | 0.013  | 0.761                   | 1.314 |
|                | Rev X Sq OFPM     | -0.023                  | 0.022          | -0.045                  | -1.027  | 0.306  | -0.066 | 0.021  | 0.899                   | 1.113 |
|                | Rev X Sq EMPL&SOC | -0.012                  | 0.036          | -0.025                  | -0.344  | 0.731  | -0.083 | 0.059  | 0.316                   | 3.164 |
|                | Rev X Sq CUST     | 0.005                   | 0.011          | 0.037                   | 0.442   | 0.659  | -0.016 | 0.026  | 0.244                   | 4.105 |



| Model          |                   | Unstandardized         | Bias                    | Standard Error | 95% bca* CI |        |
|----------------|-------------------|------------------------|-------------------------|----------------|-------------|--------|
|                |                   |                        |                         |                | Lower       | Upper  |
| H <sub>0</sub> | (Intercept)       | 3.738                  | −9.316×10 <sup>−4</sup> | 0.040          | 3.663       | 3.822  |
|                | Z Industry        | −0.002                 | 1.854×10 <sup>−4</sup>  | 0.017          | −0.038      | 0.028  |
|                | Z Age             | 0.029                  | −5.804×10 <sup>−4</sup> | 0.021          | −0.012      | 0.070  |
|                | Z Country         | −0.013                 | 7.396×10 <sup>−4</sup>  | 0.023          | −0.060      | 0.028  |
|                | Z SPLCH           | 0.159                  | 8.946×10 <sup>−4</sup>  | 0.027          | 0.096       | 0.206  |
|                | Z OFPM            | 0.110                  | −4.848×10 <sup>−4</sup> | 0.035          | 0.049       | 0.190  |
|                | Z Empl&Soc        | 0.266                  | 9.646×10 <sup>−4</sup>  | 0.030          | 0.211       | 0.332  |
|                | Z Cust            | 0.146                  | 0.002                   | 0.035          | 0.075       | 0.211  |
|                | Rev X EMPL&SOC    | 0.064                  | 0.003                   | 0.039          | 0.002       | 0.162  |
|                | Sq SSCM           | −0.052                 | 0.001                   | 0.025          | −0.112      | −0.012 |
| H <sub>1</sub> | Sq OFPM           | −0.051                 | −1.330×10 <sup>−4</sup> | 0.026          | −0.106      | −0.003 |
|                | (Intercept)       | 3.734                  | −0.007                  | 0.042          | 3.668       | 3.835  |
|                | Z Industry        | 3.953×10 <sup>−4</sup> | 3.444×10 <sup>−4</sup>  | 0.016          | −0.033      | 0.030  |
|                | Z Age             | 0.022                  | 0.003                   | 0.022          | −0.028      | 0.059  |
|                | Z Country         | −0.007                 | −6.166×10 <sup>−4</sup> | 0.022          | −0.054      | 0.033  |
|                | Z SPLCH           | 0.163                  | 0.007                   | 0.029          | 0.089       | 0.204  |
|                | Z OFPM            | 0.111                  | −0.006                  | 0.035          | 0.060       | 0.197  |
|                | Z Empl&Soc        | 0.270                  | 0.002                   | 0.033          | 0.207       | 0.338  |
|                | Z Cust            | 0.153                  | 0.006                   | 0.035          | 0.071       | 0.209  |
|                | Rev X EMPL&SOC    | 0.065                  | 0.006                   | 0.050          | −0.014      | 0.182  |
|                | Sq SSCM           | −0.047                 | 0.006                   | 0.024          | −0.110      | −0.015 |
|                | Sq OFPM           | −0.054                 | 7.628×10 <sup>−4</sup>  | 0.028          | −0.116      | −0.004 |
|                | Rev X Sq SSCM     | −0.020                 | 0.013                   | 0.035          | −0.102      | 0.030  |
|                | Rev X Sq OFPM     | −0.019                 | 0.002                   | 0.038          | −0.134      | 0.035  |
|                | Rev X Sq EMPL&SOC | −0.010                 | 0.003                   | 0.038          | −0.085      | 0.064  |
|                | Rev X Sq CUST     | 0.010                  | 0.013                   | 0.030          | −0.048      | 0.064  |

\* Bias corrected accelerated  
*Note.* Bootstrapping based on 5000 replicates.  
*Note.* Coefficient estimate is based on the median of the bootstrap distribution.

Collinearity Diagnostics

| Model          | Dimension | Eigenvalue | Condition Index | Variance Proportions |            |       |           |         |        |            |        |                |         |         |
|----------------|-----------|------------|-----------------|----------------------|------------|-------|-----------|---------|--------|------------|--------|----------------|---------|---------|
|                |           |            |                 | (Intercept)          | Z Industry | Z Age | Z Country | Z SPLCH | Z OFPM | Z Empl&Soc | Z Cust | Rev X EMPL&SOC | Sq SSCM | Sq OFPM |
| H <sub>0</sub> | 1         | 2.592      | 1.000           | 0.026                | 0.001      | 0.000 | 0.001     | 0.021   | 0.027  | 0.005      | 0.021  | 0.006          | 0.041   | 0.040   |
|                | 2         | 1.866      | 1.179           | 0.030                | 0.012      | 0.011 | 0.018     | 0.067   | 0.030  | 0.064      | 0.042  | 0.034          | 0.021   | 0.004   |
|                | 3         | 1.309      | 1.407           | 0.017                | 0.026      | 0.140 | 0.146     | 0.005   | 0.057  | 0.100      | 0.003  | 0.059          | 0.011   | 0.000   |
|                | 4         | 1.147      | 1.503           | 0.012                | 0.121      | 0.211 | 0.000     | 0.015   | 0.000  | 0.015      | 0.129  | 0.142          | 0.000   | 0.009   |
|                | 5         | 0.995      | 1.614           | 0.000                | 0.269      | 0.020 | 0.250     | 0.005   | 0.011  | 0.051      | 0.017  | 0.200          | 0.001   | 0.005   |
|                | 6         | 0.906      | 1.692           | 0.010                | 0.546      | 0.078 | 0.331     | 0.019   | 0.002  | 0.009      | 0.001  | 0.001          | 0.002   | 0.001   |
|                | 7         | 0.729      | 1.886           | 0.027                | 0.000      | 0.413 | 0.013     | 0.224   | 0.022  | 0.167      | 0.076  | 0.003          | 0.006   | 0.022   |
|                | 8         | 0.539      | 2.193           | 0.003                | 0.007      | 0.002 | 0.148     | 0.402   | 0.375  | 0.019      | 0.085  | 0.012          | 0.049   | 0.046   |
|                | 9         | 0.383      | 2.602           | 0.092                | 0.001      | 0.000 | 0.081     | 0.169   | 0.031  | 0.334      | 0.190  | 0.336          | 0.336   | 0.012   |
|                | 10        | 0.318      | 2.855           | 0.099                | 0.013      | 0.019 | 0.012     | 0.057   | 0.046  | 0.174      | 0.437  | 0.164          | 0.516   | 0.162   |
|                | 11        | 0.218      | 3.451           | 0.683                | 0.003      | 0.105 | 0.000     | 0.014   | 0.398  | 0.061      | 0.000  | 0.043          | 0.017   | 0.699   |
| H <sub>1</sub> | 1         | 2.760      | 1.000           | 0.014                | 0.000      | 0.002 | 0.002     | 0.006   | 0.018  | 0.005      | 0.026  | 0.014          | 0.027   | 0.021   |
|                | 2         | 2.285      | 1.099           | 0.019                | 0.003      | 0.011 | 0.000     | 0.015   | 0.004  | 0.002      | 0.003  | 0.010          | 0.016   | 0.023   |
|                | 3         | 1.969      | 1.184           | 0.017                | 0.012      | 0.015 | 0.016     | 0.066   | 0.030  | 0.047      | 0.038  | 0.019          | 0.011   | 0.001   |
|                | 4         | 1.331      | 1.440           | 0.006                | 0.012      | 0.185 | 0.094     | 0.002   | 0.036  | 0.088      | 0.000  | 0.035          | 0.005   | 0.000   |
|                | 5         | 1.201      | 1.516           | 0.018                | 0.053      | 0.013 | 0.126     | 0.005   | 0.037  | 0.000      | 0.001  | 0.011          | 0.007   | 0.000   |
|                | 6         | 0.989      | 1.671           | 0.004                | 0.146      | 0.001 | 0.113     | 0.041   | 0.000  | 0.073      | 0.009  | 0.091          | 0.011   | 0.001   |
|                | 7         | 0.948      | 1.706           | 0.000                | 0.719      | 0.006 | 0.162     | 0.010   | 0.000  | 0.004      | 0.021  | 0.010          | 0.002   | 0.000   |
|                | 8         | 0.754      | 1.913           | 0.010                | 0.001      | 0.313 | 0.176     | 0.032   | 0.001  | 0.009      | 0.008  | 0.000          | 0.000   | 0.016   |
|                | 9         | 0.680      | 2.014           | 0.034                | 0.027      | 0.318 | 0.018     | 0.008   | 0.018  | 0.049      | 0.016  | 0.007          | 0.006   | 0.001   |
|                | 10        | 0.586      | 2.169           | 0.001                | 0.001      | 0.002 | 0.146     | 0.011   | 0.123  | 0.005      | 0.492  | 0.011          | 0.040   | 0.061   |
|                | 11        | 0.517      | 2.310           | 0.003                | 0.009      | 0.009 | 0.019     | 0.644   | 0.246  | 0.028      | 0.028  | 0.015          | 0.024   | 0.014   |
|                | 12        | 0.340      | 2.849           | 0.174                | 0.001      | 0.028 | 0.101     | 0.061   | 0.028  | 0.156      | 0.001  | 0.151          | 0.631   | 0.015   |
|                | 13        | 0.293      | 3.070           | 0.017                | 0.011      | 0.001 | 0.004     | 0.048   | 0.064  | 0.387      | 0.347  | 0.328          | 0.211   | 0.222   |
|                | 14        | 0.206      | 3.657           | 0.641                | 0.002      | 0.096 | 0.000     | 0.007   | 0.390  | 0.146      | 0.003  | 0.119          | 0.009   | 0.622   |
|                | 15        | 0.142      | 4.415           | 0.041                | 0.003      | 0.001 | 0.023     | 0.044   | 0.005  | 0.001      | 0.007  | 0.179          | 0.000   | 0.002   |

# Unidimensional Reliability

Frequentist Scale Reliability Statistics

| Estimate           | McDonald's $\omega$ | Cronbach's $\alpha$ | mean  | sd    |
|--------------------|---------------------|---------------------|-------|-------|
| Point estimate     | 0.899               | 0.901               | 3.672 | 0.336 |
| 95% CI lower bound | 0.878               | 0.879               |       |       |
| 95% CI upper bound | 0.920               | 0.920               |       |       |
